# Supplementary material for: Association of socioeconomic factors and the risk for unintentional injuries among children in Japan: a cross-sectional study
Source: PubMed Central journal article supplement — BMJ Open. 2018 Aug 13;8(8):e021621. doi: 10.1136/bmjopen-2018-021621 (PMC6091896; doi:10.1136/bmjopen-2018-021621), 2018-08-13
Supplement: bmjopen-2018-021621.draft_revisions.pdf [file bmjopen-2018-021621.draft_revisions.pdf]

# BMJ Open

BMJ Open is committed to open peer review. As part of this commitment we make the peer review history of every article we publish publicly available.

When an article is published we post the peer reviewers' comments and the authors' responses online. We also post the versions of the paper that were used during peer review. These are the versions that the peer review comments apply to.

The versions of the paper that follow are the versions that were submitted during the peer review process. They are not the versions of record or the final published versions. They should not be cited or distributed as the published version of this manuscript.

BMJ Open is an open access journal and the full, final, typeset and author-corrected version of record of the manuscript is available on our site with no access controls, subscription charges or pay-per-view fees (<http://bmjopen.bmj.com>).

If you have any questions on BMJ Open's open peer review process please email [info.bmjopen@bmj.com](mailto:info.bmjopen@bmj.com)

# BMJ Open

## **Socioeconomic factors do not increase the risk for unintentional injuries among children in Japan: a cross-sectional study**

|                               |                                                                                                                                                                                                                                                                                                                                                                                                                                                                                            |
|-------------------------------|--------------------------------------------------------------------------------------------------------------------------------------------------------------------------------------------------------------------------------------------------------------------------------------------------------------------------------------------------------------------------------------------------------------------------------------------------------------------------------------------|
| Journal:                      | <i>BMJ Open</i>                                                                                                                                                                                                                                                                                                                                                                                                                                                                            |
| Manuscript ID                 | bmjopen-2018-021621                                                                                                                                                                                                                                                                                                                                                                                                                                                                        |
| Article Type:                 | Research                                                                                                                                                                                                                                                                                                                                                                                                                                                                                   |
| Date Submitted by the Author: | 11-Jan-2018                                                                                                                                                                                                                                                                                                                                                                                                                                                                                |
| Complete List of Authors:     | Sato, Nobuhiro; Niigata University Graduate School of Medicine, Department of Medical Informatics and Statistics<br>Hagiwara, Yusuke; Tokyo Metropolitan Children's Medical Center, Department of Pediatric Emergency and Critical Care Medicine<br>Ishikawa, Junta; Niigata University Graduate School of Medicine, Department of Medical Informatics and Statistics<br>Akazawa, Kouhei; Niigata University Graduate School of Medicine, Department of Medical Informatics and Statistics |
| Keywords:                     | EPIDEMIOLOGY, PAEDIATRICS, Socioeconomic Status, Risk factor research                                                                                                                                                                                                                                                                                                                                                                                                                      |
|                               |                                                                                                                                                                                                                                                                                                                                                                                                                                                                                            |

SCHOLARONE™  
Manuscripts

Peer Review Only

1 Socioeconomic factors do not increase the risk for unintentional injuries among  
2 children in Japan: a cross-sectional study

3

4 Nobuhiro Sato<sup>a)</sup>, Yusuke Hagiwara<sup>b)</sup>, Junta Ishikawa<sup>a)</sup>, and Kohei Akazawa<sup>a)</sup>

5

6 <sup>a</sup> Department of Medical Informatics and Statistics, Niigata University Graduate  
7 School of Medicine, Niigata, Japan

8 <sup>b</sup> Department of Pediatric Emergency and Critical Care Medicine, Tokyo  
9 Metropolitan Children's Medical Center, Fuchu, Tokyo, Japan

10

11 **Corresponding author:** Nobuhiro Sato, Department of Medical Informatics and  
12 Statistics, Niigata University Graduate School of Medicine, 1-754 Asahimachi,  
13 Chuo-ku, Niigata 951-8520, Japan. Tel.: +81-25-227-2471. Fax: +81-25-227-0850.  
14 E-mail: [s\\_nobuhiro@hosp.niigata.niigata.jp](mailto:s_nobuhiro@hosp.niigata.niigata.jp).

15

16 **Word count:** 1804

1  
2  
3  
4  
5 **17 ABSTRACT**

6  
7 **18 Objectives:** To evaluate the influence of socioeconomic factors on the risk for  
8  
9 **19** unintentional injuries among preschool children in Japan

10  
11 **20 Methods:** We used data from a web-based questionnaire survey that was sent to  
12  
13 **21** 1000 households with preschool children under 6 years of age. Multivariate  
14  
15 **22** logistic regression was performed to analyze the influence of socioeconomic  
16  
17 **23** factors on the incidence of unintentional injuries.

18  
19 **24 Results:** Overall, 976 households were eligible for the analysis, with 201  
20  
21 **25** households reporting unintentional injuries. The incidence rates for unintentional  
22  
23 **26** injury were estimated to be constant across all strata constructed using  
24  
25 **27** combinations of socioeconomic factors. The multivariate logistic regression  
26  
27 **28** analysis showed no significant differences in socioeconomic factors between  
28  
29 **29** households that reported unintentional injuries and those that did not.

30  
31 **30 Conclusion:** The findings of our study demonstrated that unintentional injuries  
32  
33 **31** among preschool children occurred at approximately fixed rates, independent of  
34  
35 **32** socioeconomic factors. Accordingly, prevention strategies for unintentional injuries  
36  
37 **33** that concern socioeconomic disadvantages should be avoided in Japan.

38  
39 **34 Keywords:** Epidemiology, Pediatrics, Risk Factor Research, Socioeconomic  
40  
41 **35** Status

42  
43  
44  
45 **37 'Strengths and limitations of this study'**

46  
47 **38** This study evaluated the influence of socioeconomic factors on the risk for  
48  
49 **39** unintentional injuries among children in Japan via a nationwide questionnaire  
50  
51 **40** survey.

52  
53 **41** We selected 1000 households with a population distribution similar to that in the  
54  
55 **42** national census.

1  
2  
3  
4  
5  
6  
7  
8  
9  
10  
11  
12  
13  
14  
15  
16  
17  
18  
19  
20  
21  
22  
23  
24  
25  
26  
27  
28  
29  
30  
31  
32  
33  
34  
35  
36  
37  
38  
39  
40  
41  
42  
43  
44  
45  
46  
47  
48  
49  
50  
51  
52  
53  
54  
55  
56  
57  
58  
59  
60

43 Although multiple logistic regression analysis was used, our inferences might be  
44 confounded by unmeasured factors, such as injury severity.

45

For peer review only

1  
2  
3  
4  
5  
6  
7  
8  
9  
10  
11  
12  
13  
14  
15  
16  
17  
18  
19  
20  
21  
22  
23  
24  
25  
26  
27  
28  
29  
30  
31  
32  
33  
34  
35  
36  
37  
38  
39  
40  
41  
42  
43  
44  
45  
46  
47  
48  
49  
50  
51  
52  
53  
54  
55  
56  
57  
58  
59  
60  
61  
62  
63  
64  
65  
66  
67  
68  
69  
70  
71  
72  
73  
74  
75  
76  
77  
78  
79  
80**INTRODUCTION**

Unintentional injuries are a leading cause of death among children of all ages.[1-4] The term “unintentional injury” in this context is defined as an injury that is not inflicted deliberately; the injury may have been caused by a fall, poisoning, drowning, burns, or traffic-related accidents. Globally, unintentional injuries accounted for 15.4% of approximately 2.6 million deaths recorded for children aged 1 to 14 years in 2013.[1] In particular, children aged 1 to 4 years demonstrate the highest all-cause and cause-specific mortality rates due to unintentional injuries.[1] The risks for unintentional injuries among children are mainly defined by individual factors (behaviors and attributes), the presence or absence of supervision, and safety equipment and vehicle safety (5). Moreover, the risks can be influenced by socioeconomic factors, including family income, parental education, single parenting, maternal age, older siblings, and type of housing.[6-13] In fact, Laursen et.al. reported that children with young mothers and mothers with only primary school education were at higher risk for most types of injuries than other children in Denmark.[10]

Similarly, in Japan, unintentional injuries have been a major cause of death among children aged  $\geq 1$  year since 1960.[14, 15] Furthermore, several socioeconomic issues exist in Japan. For example, income inequality ranks fourth highest across the Organization for Economic Cooperation and Development (OECD) member countries.[16] The relative poverty rate for households with children was 12.9% in 2015.[17] Moreover, the average age of married primigravidae is increasing, and currently stands at 30.7 years.[15] Thus far, only a few studies, however, have examined the relationship between socioeconomic status and unintentional injury among children in Japan.

1  
2  
3  
4  
5 72 The purpose of this study was to evaluate the influence of socioeconomic  
6  
7 73 factors on the risk for unintentional injuries among children in Japan via a  
8  
9 74 nationwide questionnaire survey.  
10

11 75

## 12 76 **METHODS**

### 13 77 **Study design and participants**

14  
15  
16  
17 78 This study involved a web-based questionnaire survey. The participants were  
18  
19 79 selected in January 2015 from a database of 1,370,000 candidates compiled by a  
20  
21 80 private Japanese company specializing in questionnaire-based research. We  
22  
23 81 extracted data for 1000 households with preschool children under 6 years of age.  
24  
25 82 All participants lived in Japan. Region was used as a variable for stratified random  
26  
27 83 sampling. Hence, the region-wise distribution of our sample was almost identical  
28  
29 84 to that of the general population in Japan. All respondents completed the  
30  
31 85 questionnaire on a website developed specially for this study by the survey  
32  
33 86 company. Exclusion criteria included not living with parents; missing information  
34  
35 87 regarding parent education and type of housing; and children being cared for by  
36  
37 88 people other than the parents, grandparents, kindergarten teacher, and nursery  
38  
39 89 teacher in the daytime. An urban area was defined as an area with >15 million  
40  
41 90 residents. Returning the questionnaire was taken as agreement to participate in  
42  
43 91 the study and informed consent was obtained from all participants. This study was  
44  
45 92 approved by the institutional ethics review board of Niigata City General Hospital.

46 93

### 47 94 **Measures**

48  
49  
50 95 The following socioeconomic factors were used for evaluation: father's  
51  
52 96 age; mother's age; living area; number of siblings; highest education levels of  
53  
54 97 parents; annual income of parents; type of housing; maternal employment; living  
55  
56  
57  
58  
59  
60

1  
2  
3  
4  
5 98 with grandparents; use of a sitter, kindergarten, or nursery school; and history of  
6  
7 99 injuries. Parents were divided into three groups according to the mean age of  
8  
9 100 mothers (30.7 years old) at the birth of the first child in Japan:  $\leq 29$  years, 30–39  
10  
11 101 years,  $\geq 40$  years.[15] Highest education level was classified as junior high school  
12  
13 102 or high school, business technical school or junior college, and college. Annual  
14  
15 103 income was classified as  $< 3$  million yen, 3–5 million yen,  $\geq 5$  million yen, based on  
16  
17 104 the average income in Japan (median 4.28 million yen).[17] Type of housing was  
18  
19 105 divided into house and apartment house categories. Injury was defined as  
20  
21 106 physical damage that is fatal or causes aftereffects. We included the following  
22  
23 107 types of injuries: injuries caused by falls from stairs or a balcony; burns from hot  
24  
25 108 liquids, hot surfaces, or fire; accidental poisoning; foreign body aspiration or  
26  
27 109 suffocation; drowning; and traffic injuries.[10] The question on injury mechanism  
28  
29 110 allowed multiple answers.

30  
31 111

### 32 112 **Statistical Analysis**

33  
34  
35 113 Continuous data with skewed distributions are shown as medians and  
36  
37 114 interquartile ranges, and categorical data as proportions. The Pearson's  
38  
39 115 chi-squared test was used to explore the significance of differences between  
40  
41 116 households reporting unintentional injuries and those that did not report any  
42  
43 117 injuries.

44  
45 118 Multiple logistic regression analysis was used to estimate the odds ratios and  
46  
47 119 95% confidence intervals (CIs) after controlling simultaneously for potential  
48  
49 120 confounders. We included 14 significant risk factors in the analysis (Family type,  
50  
51 121 Age of parents, Education of parents, Number of children, Presence of infant or  
52  
53 122 older siblings, Living with grandparent, Mother's employment status, Use of sitter,  
54  
55 123 kindergarten, or nursery school, Type of housing, and Annual income). All



1  
2  
3  
4  
5  
6  
7  
8  
9  
10  
11  
12  
13  
14  
15  
16  
17  
18  
19  
20  
21  
22  
23  
24  
25  
26  
27  
28  
29  
30  
31  
32  
33  
34  
35  
36  
37  
38  
39  
40  
41  
42  
43  
44  
45  
46  
47  
48  
49  
50  
51  
52  
53  
54  
55  
56  
57  
58  
59  
60

124 statistical tests were two-sided. A p-value less than 0.05 was considered  
125 statistically significant. Data analysis was performed using SPSS, version 23.0  
126 (IBM Corporation, Armonk, NY, USA).  
127

For peer review only

128

129 **RESULTS**130 **Characteristics of the study population**

131 Of the 1000 households that participated in this study, 24 families were  
 132 excluded because of missing data regarding the parents' education (n=2); type of  
 133 housing (n=17); and caregivers apart from parents, grandparents, kindergarten  
 134 teacher, and nursery school teacher (n=5). Table 1 shows the basic characteristics  
 135 of the 976 households that were included in the study. The median age of the  
 136 respondents was 38 years (interquartile range 33–42 years). In total, 201  
 137 households reported unintentional injuries among children. Table 2 presents the  
 138 distribution of the 201 unintentionally injured children according to  
 139 injury-descriptive variables. The most frequently observed mechanism of injury  
 140 was falls (67.2%), followed by burns (26.4%), poisoning/aspiration (9.5%),  
 141 drowning (4.5%), traffic injury (3.5%), and others (6.5%).

142

Table 1 Characteristics of 976 households with preschool children under 6  
 years old

| Factors            | N=976 | %    |
|--------------------|-------|------|
| <b>Respondent</b>  |       |      |
| Mother             | 569   | 58.3 |
| Father             | 407   | 41.7 |
| <b>Region</b>      |       |      |
| Urban area         | 678   | 69.5 |
| Others             | 298   | 30.5 |
| <b>Family type</b> |       |      |

|                                                |     |      |
|------------------------------------------------|-----|------|
| Two parents                                    | 936 | 95.9 |
| Single parent                                  | 40  | 4.1  |
| Number of children                             |     |      |
| 1                                              | 375 | 38.4 |
| 2                                              | 447 | 45.8 |
| ≥3                                             | 154 | 15.8 |
| Living with grandparent                        |     |      |
| Yes                                            | 389 | 39.9 |
| No                                             | 587 | 60.1 |
| Use of sitter, kindergarten, or nursery school |     |      |
| Yes                                            | 197 | 20.2 |
| No                                             | 779 | 79.8 |
| Type of housing                                |     |      |
| House                                          | 516 | 52.9 |
| Apartment                                      | 460 | 47.1 |
| Annual income                                  |     |      |
| <3 million                                     | 117 | 12.0 |
| 3–5 million                                    | 366 | 37.5 |
| >5 million                                     | 493 | 50.5 |
| Unintentional injury                           |     |      |
| Yes                                            | 201 | 20.6 |
| No                                             | 775 | 79.4 |

143

Table 2 Distribution of 201 unintentionally injured children by injury-descriptive factors

| Factors                             | n=201 | %    |
|-------------------------------------|-------|------|
| Injury mechanism (multiple answers) |       |      |
| Fall                                | 135   | 67.2 |
| Burn                                | 53    | 26.4 |
| Poisoning/Aspiration                | 19    | 9.5  |
| Drowning                            | 9     | 4.5  |
| Traffic injury                      | 7     | 3.5  |
| Others                              | 13    | 6.5  |
| Time of injury                      |       |      |
| Daytime on a weekday                | 106   | 52.7 |
| Nighttime on a weekday              | 64    | 31.8 |
| Holiday                             | 31    | 15.4 |
| Place of injury                     |       |      |
| Home                                | 188   | 93.5 |
| Outdoor                             | 13    | 6.5  |
| Management after injury             |       |      |
| Visit hospital                      | 112   | 55.7 |
| Observation at home                 | 88    | 43.8 |
| Others                              | 1     | 0.5  |

144

#### 145 **Risk factors for unintentional injury among pre-school children in Japan**

146 Table 3 shows the incidence rates for 14 socioeconomic factors. The incidence  
 147 of unintentional injury was estimated at approximately 21% with or without the  
 148 presence of socioeconomic disadvantages. The risk for unintentional injuries  
 149 was higher among preschool children with high-school graduate fathers and

150 those in families with more siblings. However, there were no significant  
 151 differences in incident rates of unintentional injuries across all groups.

152 The results of the multivariate analysis are shown in Table 4. Between  
 153 households reporting unintentional injuries and those that did not report any, no  
 154 significant differences in terms of income of parents were observed in the incident  
 155 rates of unintentional injuries among preschool children (adjusted odds ratio, 0.93;  
 156 95% CI 0.72–1.18; p=0.531). Similarly, there were no significant differences in the  
 157 other socioeconomic factors in terms of the incident rates of unintentional injuries  
 158 among preschool children.

159

Table 3 Unadjusted models of comparing households with and without child  
 unintentional injury

| Factors       | Overall<br>(n=976) | Injury (n=201) % | p-value |
|---------------|--------------------|------------------|---------|
| Family type   |                    |                  | p=0.372 |
| Two parents   | 936                | 195<br>20.8      |         |
| Single parent | 40                 | 6<br>15.0        |         |
| Age of mother |                    |                  | p=0.635 |
| <29 years     | 109                | 26<br>23.9       |         |
| 30–39 years   | 579                | 115<br>19.9      |         |
| ≥40 years     | 288                | 60<br>20.8       |         |
| Age of father |                    |                  | p=0.940 |
| <29 years     | 68                 | 14<br>20.6       |         |
| 30–39 years   | 462                | 93<br>20.1       |         |
| ≥40 years     | 446                | 94<br>21.1       |         |

12

|    |                                             |     |     |         |
|----|---------------------------------------------|-----|-----|---------|
| 1  |                                             |     |     |         |
| 2  |                                             |     |     |         |
| 3  |                                             |     |     |         |
| 4  |                                             |     |     |         |
| 5  | Education of mother                         |     |     | p=0.160 |
| 6  |                                             |     |     |         |
| 7  | High school                                 | 277 | 58  | 20.9    |
| 8  |                                             |     |     |         |
| 9  | Business technical school or junior college | 351 | 82  | 23.4    |
| 10 |                                             |     |     |         |
| 11 | College                                     | 348 | 61  | 17.5    |
| 12 |                                             |     |     |         |
| 13 | Education of father                         |     |     | p=0.200 |
| 14 |                                             |     |     |         |
| 15 | High school                                 | 281 | 68  | 24.2    |
| 16 |                                             |     |     |         |
| 17 | Business technical school or junior college | 150 | 30  | 20.0    |
| 18 |                                             |     |     |         |
| 19 | College                                     | 545 | 103 | 18.9    |
| 20 |                                             |     |     |         |
| 21 | Number of children                          |     |     | p=0.138 |
| 22 |                                             |     |     |         |
| 23 | 1                                           | 375 | 65  | 17.3    |
| 24 |                                             |     |     |         |
| 25 | 2                                           | 447 | 101 | 22.6    |
| 26 |                                             |     |     |         |
| 27 | ≥3                                          | 154 | 35  | 22.7    |
| 28 |                                             |     |     |         |
| 29 |                                             |     |     |         |
| 30 | Infant (<1 year old)                        |     |     | p=0.403 |
| 31 |                                             |     |     |         |
| 32 | Yes                                         | 170 | 31  | 18.2    |
| 33 |                                             |     |     |         |
| 34 | No                                          | 806 | 170 | 21.1    |
| 35 |                                             |     |     |         |
| 36 | Older siblings (>6 years old)               |     |     | p=0.330 |
| 37 |                                             |     |     |         |
| 38 | Yes                                         | 374 | 83  | 22.2    |
| 39 |                                             |     |     |         |
| 40 | No                                          | 602 | 118 | 19.6    |
| 41 |                                             |     |     |         |
| 42 | Living with grandmother                     |     |     | p=0.933 |
| 43 |                                             |     |     |         |
| 44 | Yes                                         | 128 | 26  | 20.3    |
| 45 |                                             |     |     |         |
| 46 | No                                          | 848 | 175 | 20.6    |
| 47 |                                             |     |     |         |
| 48 | Living with grandfather                     |     |     | p=0.466 |
| 49 |                                             |     |     |         |
| 50 | Yes                                         | 362 | 79  | 21.8    |
| 51 |                                             |     |     |         |
| 52 | No                                          | 614 | 122 | 19.9    |
| 53 |                                             |     |     |         |
| 54 |                                             |     |     |         |
| 55 |                                             |     |     |         |
| 56 |                                             |     |     |         |
| 57 |                                             |     |     |         |
| 58 |                                             |     |     |         |
| 59 |                                             |     |     |         |
| 60 |                                             |     |     |         |

|                                                |     |     |      |         |
|------------------------------------------------|-----|-----|------|---------|
| Mother's employment status                     |     |     |      | p=0.574 |
| Employed                                       | 391 | 84  | 21.5 |         |
| Unemployed                                     | 585 | 117 | 20.0 |         |
| Use of sitter, kindergarten, or nursery school |     |     |      | p=0.143 |
| Yes                                            | 197 | 48  | 24.4 |         |
| No                                             | 779 | 153 | 19.6 |         |
| Type of housing                                |     |     |      | p=0.554 |
| House                                          | 516 | 110 | 21.3 |         |
| Apartment                                      | 460 | 91  | 19.8 |         |
| Annual income                                  |     |     |      | p=0.855 |
| <3 million                                     | 117 | 25  | 21.4 |         |
| 3–5 million                                    | 366 | 78  | 21.3 |         |
| >5 million                                     | 493 | 98  | 19.9 |         |

160

Table 4 Logistic regression models of socioeconomic indicators and unintentional injuries

| Factors       | Odds ratio | 95% CI      | p-value |
|---------------|------------|-------------|---------|
| Family type   | 0.61       | (0.24–1.55) | 0.299   |
| Age of mother |            |             | 0.437   |
| <29 years     | 1          | (reference) |         |
| 30–39 years   | 0.68       | (0.37–1.23) | 0.198   |
| ≥40 years     | 0.69       | (0.34–1.38) | 0.290   |
| Age of father |            |             | 0.858   |
| <29 years     | 1          | (reference) |         |

|                                                |      |             |       |
|------------------------------------------------|------|-------------|-------|
| 30–39 years                                    | 1.22 | (0.57–2.59) | 0.611 |
| ≥40 years                                      | 1.26 | (0.56–2.83) | 0.581 |
| Education of mother                            |      |             | 0.279 |
| High school                                    | 1    | (reference) |       |
| Business technical school or junior college    | 1.22 | (0.82–1.82) | 0.324 |
| College                                        | 0.90 | (0.58–1.40) | 0.638 |
| Education of father                            |      |             | 0.500 |
| High school                                    | 1    | (reference) |       |
| Business technical school or junior college    | 0.78 | (0.47–1.29) | 0.337 |
| College                                        | 0.81 | (0.54–1.21) | 0.295 |
| Number of children                             |      |             | 0.167 |
| 1                                              | 1    | (reference) |       |
| 2                                              | 1.51 | (0.99–2.31) | 0.059 |
| ≥3                                             | 1.5  | (0.80–2.81) | 0.202 |
| Infant (<1 year old)                           | 0.78 | (0.49–1.23) | 0.280 |
| Older siblings (>6 years old)                  | 0.91 | (0.58–1.43) | 0.677 |
| Living with grandmother                        | 0.87 | (0.52–1.47) | 0.610 |
| Living with grandfather                        | 1.17 | (0.83–1.65) | 0.381 |
| Mother's employment status                     | 0.99 | (0.67–1.47) | 0.976 |
| Use of sitter, kindergarten, or nursery school | 1.38 | (0.88–2.16) | 0.163 |
| Type of housing                                | 0.97 | (0.69–1.36) | 0.838 |
| Annual income                                  |      |             | 0.839 |
| <3 million                                     | 1    | (reference) |       |
| 3–5 million                                    | 0.99 | (0.58–1.68) | 0.963 |



>5 million 0.90 (0.53–1.52) 0.680

---

161

162 **DISCUSSION**

163 Herein, we observed that unintentional injuries among preschool children  
164 under 6 years old occurred at approximately constant rates and were unrelated to  
165 any socioeconomic factors in Japan. Socioeconomic disadvantages did not  
166 significantly increase the risk for unintentional injuries among preschool children.

167 Our data showed that households whose annual income was under 3  
168 million yen accounted for 12.0% of the population, whereas the relative poverty  
169 rate for households with children was 12.9% in Japan.[17] The incidence rate of  
170 unintentional injuries observed in our study is not very different from that reported  
171 in other studies: 28.2 injuries per 100 children over a period of 1 year within a  
172 population of 0–14-year-old children in a Greek town and 24.7 medically treated  
173 injuries within a population of 0–19-year-old children and adolescents in a health  
174 maintenance organization.[8, 18]

175 Nevertheless, our results differ from the outcomes reported in other  
176 studies of the relationship between unintentional injuries and socioeconomic  
177 factors.[7, 10, 12] There are several explanations for these results. First, these  
178 results could be attributed to the injury mechanism. In a previous study, the effect  
179 of the socioeconomic factors varied between injury mechanisms.[10] The risk for  
180 burns (relative risk 1.9) and poisoning (relative risk 1.7) was higher in the  
181 lowest-income group than in the highest-income group, while the risk for falls was  
182 not significantly higher.[10] The most common injury mechanism was falls in our  
183 study. Second, younger age of children, may affect the relationship between the  
184 risk for unintentional injuries and socioeconomic factors. A previous study showed  
185 very minor socioeconomic differences in the injury risk among 0–4-year-old

1  
2  
3  
4  
5 186 children in Sweden.[19] However, socioeconomic differences were observed for  
6  
7 187 traffic injury risk from the age of 5 years onwards.[19] Another study reported that  
8  
9 188 the relative risk of being injured in a road traffic incident is higher for  
10  
11 189 5–19-year-olds belonging to a low social class than for those belonging to other  
12  
13 190 social classes.[20] The age of the children, which was under 6 years old in our  
14  
15 191 study, may help to explain the disadvantage of lower socioeconomic classes.  
16  
17 192 Finally, the following characteristics specific to Japan might reduce the  
18  
19 193 socioeconomic differences: relatively low exposure to environmental hazards, the  
20  
21 194 social support network, and ethnic homogeneity.[21] The absolute number of  
22  
23 195 traffic accidents in Japan has gradually decreased from 887000 in 2006 to 499000  
24  
25 196 in 2016, owing to new road traffic laws and improvements in the quality of roads,  
26  
27 197 vehicle engineering, and driver behavior.[22, 23] The Japanese government  
28  
29 198 provides households with children's allowances according to income, employment  
30  
31 199 or financial support for single parent families, and visits for all families with  
32  
33 200 infants.[24] All municipalities in Japan conduct health checkups at healthcare  
34  
35 201 centers for children aged 18–23 months and children aged 36–47 months despite  
36  
37 202 socioeconomic differences. The mean response rate for these health checkups is  
38  
39 203 over 90%.[25]

40  
41 204 Taken together, our data and those from previous studies, confirm that  
42  
43 205 the relationship between unintentional injury and socioeconomic factors differs for  
44  
45 206 each nation.[7, 8, 10, 11] It is difficult to generalize the influence of socioeconomic  
46  
47 207 factors on the risk for unintentional childhood injuries. Therefore, prevention  
48  
49 208 strategies should vary from country to country. In Japan, prevention strategies  
50  
51 209 that consider socioeconomic disadvantages would be inadequate. A  
52  
53 210 comprehensive approach that involves health checkups could be a useful method  
54  
55 211 for prevention of unintentional injuries.

212

**213 Limitations**

214           This study had several limitations. First, only those households that had  
215 access to the internet were included. However, we selected households with a  
216 population distribution similar to that in the national census. In addition, there were  
217 no differences between the relative poverty rates recorded in our study and those  
218 for the whole nation. Second, the outcome measures were based on self-reporting.  
219 The respondents may have been unaware of incidences of unintentional injury,  
220 and thus, the incidence of unintentional injury might be underestimated. However,  
221 the incident rates recorded in our study are not very different from those obtained  
222 in other studies. Finally, different injury severities might constitute a confounding  
223 factor. Whether injuries tend to be more serious in lower socioeconomic groups  
224 than in higher ones remains to be investigated. Future studies should measure the  
225 severity of unintentional injuries among children more explicitly.

226

**227 Conclusion**

228           Unintentional injuries among preschool children occurred at approximately  
229 constant rates irrespective of the presence of socioeconomic factors. The  
230 association between socioeconomic factors and unintentional injury varies across  
231 different countries. Prevention strategies aimed at unintentional injuries that take  
232 socioeconomic disadvantages into consideration may not be applicable in Japan.

233

1  
2  
3  
4  
5 234 **CONTRIBUTORSHIP STATEMENT**

6  
7 235 NS conceived the study. YH, JI and KA supervised the conduct of the trial  
8  
9 236 and data collection. NS managed the data, including quality control. KA provided  
10  
11 237 statistical advice on the study design and analyzed the data; NS chaired the data  
12  
13 238 oversight committee. NS, YH, and KA drafted the manuscript, and all authors  
14  
15 239 contributed substantially to its revision. NS takes responsibility for the paper as a  
16  
17 240 whole. All authors read and approved the final manuscript.

18  
19 241

20  
21 242 **COMPETING INTERESTS**

22  
23 243 None declared.

24  
25 244

26  
27 245 **FUNDING**

28  
29 246 We did not receive any specific funding for the study.

30  
31 247

32  
33 248 **DATA SHARING STATEMENT**

34  
35 249 No additional data are available.

36  
37 250  
38  
39  
40  
41  
42  
43  
44  
45  
46  
47  
48  
49  
50  
51  
52  
53  
54  
55  
56  
57  
58  
59  
60

251

252 **References**

- 253 1. Alonge O, Khan UR, Hyder AA. Our Shrinking Globe: Implications for Child  
254 Unintentional Injuries. *Pediatr Clin North Am* 2016;63:167–81.
- 255 2. Alonge O, Hyder AA. Reducing the global burden of childhood  
256 unintentional injuries. *Arch Dis Child* 2014;99:62–9.
- 257 3. Hyder AA, Wali S, Fishman S, et al. The burden of unintentional injuries  
258 among the under-five population in South Asia. *Acta Paediatr*  
259 2008;97:267–75.
- 260 4. Krug EG, Sharma GK, Lozano R. The global burden of injuries. *Am J*  
261 *Public Health* 2000;90:523–6.
- 262 5. Peden M, Oyegbite K, Ozanne-Smith J, et al. *World Report on Child Injury*  
263 *Prevention*. Geneva: World Health Organization, 2008.
- 264 6. Nathens AB, Neff MJ, Goss CH, et al. Effect of an older sibling and birth  
265 interval on the risk of childhood injury. *Inj Prev* 2000;6:219–22.
- 266 7. Hjern A, Ringback-Weitof G, Andersson R. Socio-demographic risk factors  
267 for home-type injuries in Swedish infants and toddlers. *Acta Paediatr*  
268 2001;90:61–8.
- 269 8. Petridou E, Anastasiou A, Katsiardanis K, et al. A prospective  
270 population-based study of childhood injuries: the Velestino town study. *Eur*  
271 *J Public Health* 2005;15:9–14.
- 272 9. Weitof GR, Hjern A, Haglund B, et al. Mortality, severe morbidity, and  
273 injury in children living with single parents in Sweden: a population-based  
274 study. *Lancet* 2003;361:289–95.
- 275 10. Laursen B, Nielsen JW. Influence of sociodemographic factors on the risk  
276 of unintentional childhood home injuries. *Eur J Public Health*

- 1  
2  
3  
4  
5 277 2008;18:366–70.  
6  
7 278 11. Faelker T, Pickett W, Brison RJ. Socioeconomic differences in childhood  
8  
9 279 injury: a population-based epidemiologic study in Ontario, Canada. *Inj*  
10  
11 280 *Prev* 2000;6:203–8.  
12  
13 281 12. Laflamme L, Diderichsen F. Social differences in traffic injury risks in  
14  
15 282 childhood and youth--a literature review and a research agenda. *Inj Prev*  
16  
17 283 2000;6:293–8.  
18  
19 284 13. de Lourdes Drachler M, de Carvalho Leite JC, Marshall T, et al. Effects of  
20  
21 285 the home environment on unintentional domestic injuries and related  
22  
23 286 health care attendance in infants. *Acta Paediatr* 2007;96:1169–73.  
24  
25 287 14. Sekii H, Ohtsu T, Shirasawa T, et al. Childhood mortality due to  
26  
27 288 unintentional injuries in Japan, 2000–2009. *Int J Environ Res Public Health*  
28  
29 289 2013;10:528–40.  
30  
31 290 15. Director-General for statistics and information policy, Ministry of Health,  
32  
33 291 Labour and Welfare. Vital statistics in Japan. Trends up to 2015.  
34  
35 292 <http://www.mhlw.go.jp/english/database/db-hw/dl/81-1a2en.pdf> (accessed  
36  
37 293 20 Nov 2017).  
38  
39 294 16. OECD Rights and Translation Unit. Growing Unequal? Income Distribution  
40  
41 295 and Poverty in OECD Countries. Paris: OECD publications 2008.  
42  
43 296 17. Ministry of Health, Labour and Welfare. Comprehensive Survey of Living  
44  
45 297 Conditions of the People on Health and Welfare. Tokyo: Ministry of Health,  
46  
47 298 Labour and Welfare 2016.  
48  
49 299 18. Rivara FP, Calonge N, Thompson RS. Population-based study of  
50  
51 300 unintentional injury incidence and impact during childhood. *Am J Public*  
52  
53 301 *Health* 1989;79:990–4.  
54  
55 302 19. Engstrom K, Diderichsen F, Laflamme L. Socioeconomic differences in

- 1  
2  
3  
4  
5 303 injury risks in childhood and adolescence: a nation-wide study of  
6  
7 304 intentional and unintentional injuries in Sweden. *Inj Prev* 2002;8:137–42.  
8  
9 305 20. Laflamme L, Engstrom K. Socioeconomic differences in Swedish children  
10  
11 306 and adolescents injured in road traffic incidents: cross sectional study.  
12  
13 307 *BMJ* 2002;324:396–7.  
14  
15 308 21. Kagamimori S, Gaina A, Nasermoaddeli A. Socioeconomic status and  
16  
17 309 health in the Japanese population. *Soc Sci Med* 2009;68:2152–60.  
18  
19 310 22. Nagata T, Setoguchi S, Hemenway D, et al. Effectiveness of a law to  
20  
21 311 reduce alcohol-impaired driving in Japan. *Inj Prev* 2008;14:19–23.  
22  
23 312 23. National Police Agency. Trends in traffic accidents by year. Tokyo: Traffic  
24  
25 313 accidents situation 2016.  
26  
27 314 24. Ministry of Health, Labour and Welfare. Equal Employment and Child  
28  
29 315 Welfare. Tokyo: Ministry of Health, Labour and Welfare 2015.  
30  
31 316 25. Yamamoto N, Honda C, Nagata S. Current trends and age-based  
32  
33 317 differences of unintentional injury in Japanese children. *Biosci Trends*  
34  
35 318 2016;10:152–7.  
36  
37 319

## STROBE Statement—checklist of items that should be included in reports of observational studies

|                              | Item No | Recommendation                                                                                                                                                                                                         | Reported on page # |
|------------------------------|---------|------------------------------------------------------------------------------------------------------------------------------------------------------------------------------------------------------------------------|--------------------|
| <b>Title and abstract</b>    | 1       | (a) Indicate the study's design with a commonly used term in the title or the abstract                                                                                                                                 | p2                 |
|                              |         | (b) Provide in the abstract an informative and balanced summary of what was done and what was found                                                                                                                    | p2                 |
| <b>Introduction</b>          |         |                                                                                                                                                                                                                        |                    |
| Background/rationale         | 2       | Explain the scientific background and rationale for the investigation being reported                                                                                                                                   | P4                 |
| Objectives                   | 3       | State specific objectives, including any prespecified hypotheses                                                                                                                                                       | P4                 |
| <b>Methods</b>               |         |                                                                                                                                                                                                                        |                    |
| Study design                 | 4       | Present key elements of study design early in the paper                                                                                                                                                                | P5                 |
| Setting                      | 5       | Describe the setting, locations, and relevant dates, including periods of recruitment, exposure, follow-up, and data collection                                                                                        | P5                 |
| Participants                 | 6       | (a) <i>Cohort study</i> —Give the eligibility criteria, and the sources and methods of selection of participants. Describe methods of follow-up                                                                        | P5                 |
|                              |         | <i>Case-control study</i> —Give the eligibility criteria, and the sources and methods of case ascertainment and control selection. Give the rationale for the choice of cases and controls                             |                    |
|                              |         | <i>Cross-sectional study</i> —Give the eligibility criteria, and the sources and methods of selection of participants                                                                                                  |                    |
|                              |         | (b) <i>Cohort study</i> —For matched studies, give matching criteria and number of exposed and unexposed<br><i>Case-control study</i> —For matched studies, give matching criteria and the number of controls per case |                    |
| Variables                    | 7       | Clearly define all outcomes, exposures, predictors, potential confounders, and effect modifiers. Give diagnostic criteria, if applicable                                                                               | P5, 6              |
| Data sources/<br>measurement | 8*      | For each variable of interest, give sources of data and details of methods of assessment (measurement). Describe comparability of assessment methods if there is more than one group                                   | P5,6               |
| Bias                         | 9       | Describe any efforts to address potential sources of bias                                                                                                                                                              | P5,6               |
| Study size                   | 10      | Explain how the study size was arrived at                                                                                                                                                                              | P5                 |
| Quantitative variables       | 11      | Explain how quantitative variables were handled in the analyses. If applicable, describe which groupings were chosen and why                                                                                           | P6                 |
| Statistical methods          | 12      | (a) Describe all statistical methods, including those used to control for confounding                                                                                                                                  | P6                 |
|                              |         | (b) Describe any methods used to examine subgroups and interactions                                                                                                                                                    | P6                 |
|                              |         | (c) Explain how missing data were addressed                                                                                                                                                                            | P5                 |
|                              |         | (d) <i>Cohort study</i> —If applicable, explain how loss to follow-up was addressed<br><i>Case-control study</i> —If applicable, explain how matching of cases and controls was addressed                              | P5                 |



*Cross-sectional study*—If applicable, describe analytical methods taking account of sampling strategy

(e) Describe any sensitivity analyses

**Results**

|                  |     |                                                                                                                                                                                                              |                |
|------------------|-----|--------------------------------------------------------------------------------------------------------------------------------------------------------------------------------------------------------------|----------------|
| Participants     | 13* | (a) Report numbers of individuals at each stage of study—eg numbers potentially eligible, examined for eligibility, confirmed eligible, included in the study, completing follow-up, and analysed            | P7             |
|                  |     | (b) Give reasons for non-participation at each stage                                                                                                                                                         | P7             |
|                  |     | (c) Consider use of a flow diagram                                                                                                                                                                           |                |
| Descriptive data | 14* | (a) Give characteristics of study participants (eg demographic, clinical, social) and information on exposures and potential confounders                                                                     | P7,8,9         |
|                  |     | (b) Indicate number of participants with missing data for each variable of interest                                                                                                                          | P7             |
|                  |     | (c) <i>Cohort study</i> —Summarise follow-up time (eg, average and total amount)                                                                                                                             |                |
| Outcome data     | 15* | <i>Cohort study</i> —Report numbers of outcome events or summary measures over time                                                                                                                          |                |
|                  |     | <i>Case-control study</i> —Report numbers in each exposure category, or summary measures of exposure                                                                                                         |                |
|                  |     | <i>Cross-sectional study</i> —Report numbers of outcome events or summary measures                                                                                                                           | P7,8,9         |
| Main results     | 16  | (a) Give unadjusted estimates and, if applicable, confounder-adjusted estimates and their precision (eg, 95% confidence interval). Make clear which confounders were adjusted for and why they were included | P9,10,11,12,13 |
|                  |     | (b) Report category boundaries when continuous variables were categorized                                                                                                                                    | P9,10,11,12    |
|                  |     | (c) If relevant, consider translating estimates of relative risk into absolute risk for a meaningful time period                                                                                             |                |
| Other analyses   | 17  | Report other analyses done—eg analyses of subgroups and interactions, and sensitivity analyses                                                                                                               |                |

**Discussion**

|                  |    |                                                                                                                                                                            |        |
|------------------|----|----------------------------------------------------------------------------------------------------------------------------------------------------------------------------|--------|
| Key results      | 18 | Summarise key results with reference to study objectives                                                                                                                   | P14    |
| Limitations      | 19 | Discuss limitations of the study, taking into account sources of potential bias or imprecision. Discuss both direction and magnitude of any potential bias                 | P15,16 |
| Interpretation   | 20 | Give a cautious overall interpretation of results considering objectives, limitations, multiplicity of analyses, results from similar studies, and other relevant evidence | P14,15 |
| Generalisability | 21 | Discuss the generalisability (external validity) of the study results                                                                                                      | P14,15 |

**Other information**

|         |    |                                                                                                                                                               |     |
|---------|----|---------------------------------------------------------------------------------------------------------------------------------------------------------------|-----|
| Funding | 22 | Give the source of funding and the role of the funders for the present study and, if applicable, for the original study on which the present article is based | P17 |
|---------|----|---------------------------------------------------------------------------------------------------------------------------------------------------------------|-----|

\*Give information separately for cases and controls in case-control studies and, if applicable, for exposed and unexposed groups in cohort and cross-sectional studies.

1  
2 **Note:** An Explanation and Elaboration article discusses each checklist item and gives methodological background and published examples of transparent reporting. The STROBE  
3 checklist is best used in conjunction with this article (freely available on the Web sites of PLoS Medicine at <http://www.plosmedicine.org/>, Annals of Internal Medicine at  
4 <http://www.annals.org/>, and Epidemiology at <http://www.epidem.com/>). Information on the STROBE Initiative is available at [www.strobe-statement.org](http://www.strobe-statement.org).  
5  
6  
7  
8  
9  
10  
11  
12  
13  
14  
15  
16  
17  
18  
19  
20  
21  
22  
23  
24  
25  
26  
27  
28  
29  
30  
31  
32  
33  
34  
35  
36  
37  
38  
39  
40  
41  
42  
43  
44  
45  
46

For peer review only

# BMJ Open

## Association of socioeconomic factors and the risk for unintentional injuries among children in Japan: a cross-sectional study

|                                 |                                                                                                                                                                                                                                                                                                                                                                                                                                                                                            |
|---------------------------------|--------------------------------------------------------------------------------------------------------------------------------------------------------------------------------------------------------------------------------------------------------------------------------------------------------------------------------------------------------------------------------------------------------------------------------------------------------------------------------------------|
| Journal:                        | <i>BMJ Open</i>                                                                                                                                                                                                                                                                                                                                                                                                                                                                            |
| Manuscript ID                   | bmjopen-2018-021621.R1                                                                                                                                                                                                                                                                                                                                                                                                                                                                     |
| Article Type:                   | Research                                                                                                                                                                                                                                                                                                                                                                                                                                                                                   |
| Date Submitted by the Author:   | 09-May-2018                                                                                                                                                                                                                                                                                                                                                                                                                                                                                |
| Complete List of Authors:       | Sato, Nobuhiro; Niigata University Graduate School of Medicine, Department of Medical Informatics and Statistics<br>Hagiwara, Yusuke; Tokyo Metropolitan Children's Medical Center, Department of Pediatric Emergency and Critical Care Medicine<br>Ishikawa, Junta; Niigata University Graduate School of Medicine, Department of Medical Informatics and Statistics<br>Akazawa, Kouhei; Niigata University Graduate School of Medicine, Department of Medical Informatics and Statistics |
| <b>Primary Subject Heading</b>: | Epidemiology                                                                                                                                                                                                                                                                                                                                                                                                                                                                               |
| Secondary Subject Heading:      | Paediatrics, Epidemiology                                                                                                                                                                                                                                                                                                                                                                                                                                                                  |
| Keywords:                       | EPIDEMIOLOGY, PAEDIATRICS, Socioeconomic Status, Risk factor research                                                                                                                                                                                                                                                                                                                                                                                                                      |
|                                 |                                                                                                                                                                                                                                                                                                                                                                                                                                                                                            |

SCHOLARONE™  
Manuscripts

Only

1 Association of socioeconomic factors and the risk for unintentional injuries among  
2 children in Japan: a cross-sectional study

3

4 Nobuhiro Sato<sup>a)</sup>, Yusuke Hagiwara<sup>b)</sup>, Junta Ishikawa<sup>a)</sup>, and Kohei Akazawa<sup>a)</sup>

5

6 <sup>a</sup> Department of Medical Informatics and Statistics, Niigata University Graduate  
7 School of Medicine, Niigata, Japan

8 <sup>b</sup> Department of Pediatric Emergency and Critical Care Medicine, Tokyo  
9 Metropolitan Children's Medical Center, Fuchu, Tokyo, Japan

10

11 **Corresponding author:** Nobuhiro Sato, Department of Medical Informatics and  
12 Statistics, Niigata University Graduate School of Medicine, 1-754 Asahimachi,  
13 Chuo-ku, Niigata 951-8520, Japan. Tel.: +81-25-227-2471. Fax: +81-25-227-0850.  
14 E-mail: [s\\_nobuhiro@hosp.niigata.niigata.jp](mailto:s_nobuhiro@hosp.niigata.niigata.jp).

15

16 **Word count:** 2346

1  
2  
3  
4  
5 17 **ABSTRACT**  
6

7 18 **Objectives:** While Japan has socioeconomic issues, such as income inequality,  
8  
9 19 little is known about the association between socioeconomic factors and the risk  
10  
11 20 of unintentional childhood injuries. The purpose of the study was to evaluate the  
12  
13 21 influence of socioeconomic factors on the risk for unintentional injuries among  
14  
15 22 preschool children in Japan.

16  
17 23 **Methods:** We used data from a web-based questionnaire survey that was sent to  
18  
19 24 1000 households with preschool children under 6 years of age. Multivariate  
20  
21 25 logistic regression was performed to analyze the influence of socioeconomic  
22  
23 26 factors on the incidence of unintentional injuries.

24  
25 27 **Results:** Overall, 976 households were eligible for the analysis, with 201  
26  
27 28 households reporting unintentional injuries. The incidence rates for unintentional  
28  
29 29 injury were estimated to be constant across all strata constructed using  
30  
31 30 combinations of socioeconomic factors. The multivariate logistic regression  
32  
33 31 analysis showed no significant differences in socioeconomic factors between  
34  
35 32 households that reported unintentional injuries and those that did not.

36  
37 33 **Conclusion:** The findings of our study demonstrated that unintentional injuries  
38  
39 34 among preschool children occurred at approximately fixed rates, independent of  
40  
41 35 socioeconomic factors. Accordingly, prevention strategies for unintentional injuries  
42  
43 36 that focus on socioeconomic disadvantages should be avoided in Japan.

44  
45 37 **Keywords:** Epidemiology, Pediatrics, Risk Factor Research, Socioeconomic  
46  
47 38 Status  
48

49  
50  
51 40 **'Strengths and limitations of this study'**  
52  
53  
54  
55  
56  
57  
58  
59  
60

1  
2  
3  
4  
5 41 This study evaluated the influence of socioeconomic factors on the risk of  
6  
7 42 unintentional injuries among children in Japan via a nationwide questionnaire  
8  
9 43 survey.

10  
11 44 We selected 1000 households with a population distribution similar to that in the  
12  
13 45 national census.

14  
15 46 Although multiple logistic regression analysis was used, our inferences might be  
16  
17 47 confounded by unmeasured factors, such as physical disability of the children.  
18

19 48

## 49 INTRODUCTION

50 Unintentional injuries are a leading cause of death among children of all ages.<sup>1-4</sup>

51 The term “unintentional injury” in this context is defined as an injury that is not  
52 inflicted deliberately; the injury may have been caused by a fall, poisoning,  
53 drowning, burns, or traffic-related accidents. Globally, unintentional injuries  
54 accounted for 15.4% of approximately 2.6 million deaths recorded for children  
55 aged 1 to 14 years in 2013.<sup>1</sup> In particular, children aged 1 to 4 years demonstrate  
56 the highest all-cause and cause-specific mortality rates due to unintentional  
57 injuries.<sup>1</sup> The risks for unintentional injuries among children are mainly defined by  
58 individual factors (behaviors and attributes), the presence or absence of  
59 supervision, and safety equipment and vehicle safety.<sup>5</sup> Moreover, the risks can be  
60 influenced by socioeconomic factors, including family income, parental education,  
61 single parenting, maternal age, older siblings, and type of housing.<sup>6-13</sup> In fact,  
62 Laursen et.al. reported that children with young mothers and mothers with only  
63 primary school education were at higher risk for most types of injuries than other  
64 children in Denmark.<sup>10</sup>

65 Similarly, in Japan, unintentional injuries have been a major cause of death  
66 among children aged  $\geq 1$  year since 1960.<sup>14 15</sup> Furthermore, several  
67 socioeconomic issues exist in Japan. For example, Japan is ranked fourth highest  
68 for income inequality across the Organization for Economic Cooperation and  
69 Development (OECD) member countries.<sup>16</sup> The relative poverty rate for  
70 households with children was 12.9% in 2015.<sup>17</sup> A previous study revealed the  
71 association between socioeconomic inequality and the risk for infant abuse in  
72 Japan.<sup>18</sup> However, only a few studies have examined the relationship between  
73 socioeconomic status and unintentional injury among children in Japan thus far.

74 The purpose of this study was to evaluate the influence of socioeconomic

1  
2  
3  
4  
5 75 factors on the risk for unintentional injuries among children in Japan via a  
6  
7 76 nationwide questionnaire survey.  
8  
9 77

## 10 78 **METHODS**

### 11 79 **Study design and participants**

12  
13  
14  
15 80 This study involved a web-based questionnaire survey. The participants were  
16  
17 81 selected in January 2015 from a database of 1,370,000 candidates compiled by a  
18  
19 82 private Japanese company specializing in questionnaire-based research. We  
20  
21 83 extracted data for 1000 households with preschool children under 6 years of age.  
22  
23 84 All participants lived in Japan. Region was used as a variable for stratified random  
24  
25 85 sampling. Hence, the region-wise distribution of our sample was almost identical  
26  
27 86 to that of the general population in Japan. All respondents completed the  
28  
29 87 questionnaire on a website developed specially for this study by the survey  
30  
31 88 company. Exclusion criteria included not living with parents; missing information  
32  
33 89 regarding parent education and type of housing; and children being cared for by  
34  
35 90 people other than the parents, grandparents, kindergarten teachers, and nursery  
36  
37 91 teachers during the daytime. An urban area was defined as an area with >15  
38  
39 92 million residents. Returning the questionnaire was taken as agreement to  
40  
41 93 participate in the study and informed consent was obtained from all participants.  
42  
43 94 This study was approved by the institutional ethics review board of Niigata City  
44  
45 95 General Hospital.  
46  
47 96

### 48 97 **Measures**

49  
50 98 The questionnaire included 20 questions about basic and socioeconomic  
51  
52 99 characteristics and 17 questions concerning unintentional injuries. The following  
53  
54 100 socioeconomic factors were used for evaluation: father's age; mother's age; living  
55  
56  
57  
58  
59  
60



1  
2  
3  
4  
5 101 area; number of siblings; highest education level of parents; annual income of  
6  
7 102 parents; type of housing; parents' employment status; living with grandparents;  
8  
9 103 primary caregiver during the daytime and at night; use of a sitter, kindergarten, or  
10  
11 104 nursery school; and history of injuries. Parents were divided into three groups  
12  
13 105 according to the mean age of mothers (30.7 years old) at the birth of the first child  
14  
15 106 in Japan:  $\leq 29$  years, 30–39 years,  $\geq 40$  years.<sup>15</sup> Highest education level was  
16  
17 107 classified as junior high school or high school, business technical school or junior  
18  
19 108 college, and college. Annual income was classified as  $< 3$  million yen, 3–5 million  
20  
21 109 yen, and  $\geq 5$  million yen, based on the average income in Japan (median 4.28  
22  
23 110 million yen).<sup>17</sup> Type of housing was divided into house and apartment categories.  
24  
25 111 Injury was defined as physical damage that is fatal or causes aftereffects. We  
26  
27 112 included the following types of injuries: all injuries, such as falls from stairs or a  
28  
29 113 balcony; burns from hot liquids, hot surfaces, or fire; accidental poisoning; foreign  
30  
31 114 body aspiration or suffocation; drowning; and traffic injuries.<sup>10</sup> The information  
32  
33 115 collected about unintentional injuries included gender of child, time, place of injury,  
34  
35 116 witnessed by others or not, and management after injury. The injury mechanism  
36  
37 117 was defined as the injury that the respondent considered to be the most severe.  
38  
39 118

### 119 **Statistical Analysis**

120 The sample size calculation was performed on the basis of a statistical power of  
121 80%, two-sided P-value of 0.05, an event rate of 25%, and a relative risk of  
122 socioeconomic disadvantage of 1.2, obtained from previous studies.<sup>8 10 19</sup>

123 Continuous data with skewed distributions are shown as medians and  
124 interquartile ranges, and categorical data as proportions. The Pearson's  
125 chi-squared test or Fisher's exact test was used to explore the significance of  
126 differences between households reporting unintentional injuries and those that did

1  
2  
3  
4  
5 127 not report any injuries.

6  
7 128 Multiple logistic regression analysis was used to estimate the odds ratios and  
8  
9 129 95% confidence intervals (CIs) after controlling simultaneously for potential  
10  
11 130 confounders. We used unintentional injury as the dependent variable. We  
12  
13 131 included 15 significant risk factors in the analysis (family type, age of parents,  
14  
15 132 education of parents, number of children, presence of infant or older siblings,  
16  
17 133 living with grandparent, parents' employment status, use of sitter, kindergarten, or  
18  
19 134 nursery school, type of housing, and annual income). All statistical tests were  
20  
21 135 two-sided. A p-value less than 0.05 was considered statistically significant. Data  
22  
23 136 analysis was performed using SPSS, version 23.0 (IBM Corporation, Armonk, NY,  
24  
25 137 USA).

26  
27 138

### 28 29 139 **Patient and Public Involvement**

30  
31 140 The participants in this web-based questionnaire survey were selected  
32  
33 141 from a database of candidates compiled by a private Japanese company  
34  
35 142 specializing in questionnaire-based research. Returning the questionnaire was  
36  
37 143 taken as agreement to participate in the study and informed consent was obtained  
38  
39 144 from all participants.

40  
41 145

## 42 43 146 **RESULTS**

### 44 45 147 **Characteristics of the study population**

46  
47 148 Of the 1000 households that participated in this study, 24 families were  
48  
49 149 excluded because of missing data regarding the parents' education (n=2); type of  
50  
51 150 housing (n=17); and primary caregivers apart from parents, grandparents,  
52  
53 151 kindergarten teachers, and nursery school teachers during the daytime (n=5).

54  
55 152 Table 1 shows the basic characteristics of the 976 households that were included

153 in the study. The median age of the respondents was 38 years (interquartile range  
 154 33–42 years). In total, 201 households reported unintentional injuries among  
 155 children. Table 2 presents the distribution of the 201 unintentionally injured  
 156 children according to injury-descriptive variables. The most frequently observed  
 157 mechanism of injury was falls (58.2%), followed by burns (23.4%),  
 158 poisoning/aspiration (6.0%), drowning (3.0%), traffic injury (3.5%), and others  
 159 (6.0%).

160

Table 1. Characteristics of the 976 households with preschool children under  
 6 years old

| Factors                 | N=976 | %    |
|-------------------------|-------|------|
| Respondent              |       |      |
| Mother                  | 569   | 58.3 |
| Father                  | 407   | 41.7 |
| Region                  |       |      |
| Urban area              | 678   | 69.5 |
| Others                  | 298   | 30.5 |
| Family type             |       |      |
| Two parents             | 936   | 95.9 |
| Single parent           | 40    | 4.1  |
| Number of children      |       |      |
| 1                       | 375   | 38.4 |
| 2                       | 447   | 45.8 |
| ≥3                      | 154   | 15.8 |
| Living with grandparent |       |      |

|                                                |     |      |
|------------------------------------------------|-----|------|
| Yes                                            | 389 | 39.9 |
| No                                             | 587 | 60.1 |
| Use of sitter, kindergarten, or nursery school |     |      |
| Yes                                            | 197 | 20.2 |
| No                                             | 779 | 79.8 |
| Type of housing                                |     |      |
| House                                          | 516 | 52.9 |
| Apartment                                      | 460 | 47.1 |
| Annual income (Yen)                            |     |      |
| <3 million                                     | 117 | 12.0 |
| 3–5 million                                    | 366 | 37.5 |
| >5 million                                     | 493 | 50.5 |
| Unintentional injury                           |     |      |
| Yes                                            | 201 | 20.6 |
| No                                             | 775 | 79.4 |

161

Table 2. Distribution of 201 unintentionally injured children by injury-descriptive factors

| Factors              | n=201 | %    |
|----------------------|-------|------|
| Injury mechanism     |       |      |
| Fall                 | 117   | 58.2 |
| Burn                 | 47    | 23.4 |
| Poisoning/Aspiration | 12    | 6.0  |
| Drowning             | 6     | 3.0  |
| Traffic injury       | 7     | 3.5  |

|                         |     |      |
|-------------------------|-----|------|
| Others                  | 12  | 6.0  |
| Gender of child         |     |      |
| Male                    | 119 | 59.2 |
| Female                  | 82  | 40.8 |
| Time of injury          |     |      |
| Daytime on a weekday    | 106 | 52.7 |
| Nighttime on a weekday  | 64  | 31.8 |
| Holiday                 | 31  | 15.4 |
| Place of injury         |     |      |
| Home                    | 188 | 93.5 |
| Outdoor                 | 13  | 6.5  |
| Witnessed by caregivers |     |      |
| Yes                     | 129 | 64.2 |
| No                      | 72  | 35.8 |
| Management after injury |     |      |
| Visit hospital          | 112 | 55.7 |
| Observation at home     | 88  | 43.8 |
| Others                  | 1   | 0.5  |

162

### 163 **Risk factors for unintentional injury among preschool children in Japan**

164 Table 3 shows the incidence rates of 15 socioeconomic factors. The incidence  
 165 of unintentional injury was estimated at approximately 21% with or without the  
 166 presence of socioeconomic disadvantages. The risk for unintentional injuries  
 167 was higher among preschool children with high-school graduate fathers and  
 168 those in families with more siblings. However, there were no significant

1  
2  
3  
4  
5 169 differences in incident rates of unintentional injuries across all groups. Table 4  
6  
7 170 shows the association between socioeconomic factors and timing of injury. Table  
8  
9 171 5 shows the association between socioeconomic factors and management after  
10  
11 172 injury. Consistent with the main results, there was no relationship between  
12  
13 173 socioeconomic factors and the variables in these tables.

14  
15 174 The results of the multivariate analysis are shown in Table 6. Between  
16  
17 175 households reporting unintentional injuries and those that did not report any, no  
18  
19 176 significant differences in terms of income of parents were observed in the incident  
20  
21 177 rates of unintentional injuries among preschool children (adjusted odds ratio, 0.90;  
22  
23 178 95% CI 0.53–1.53;  $p=0.701$ ). Similarly, there were no significant differences in the  
24  
25 179 other socioeconomic factors in terms of the incident rates of unintentional injuries  
26  
27 180 among preschool children.

181

Table 3. Unadjusted risk for Unintentional injuries among children and socioeconomic factors

| Factors             | Overall<br>(n=976) | Unintentional injury |        |                          |          |                   |        |         | p-value <sup>†</sup> |         |
|---------------------|--------------------|----------------------|--------|--------------------------|----------|-------------------|--------|---------|----------------------|---------|
|                     |                    | Fall                 | Burn   | Poisoning/<br>Aspiration | Drowning | Traffic<br>injury | Others | Total   |                      |         |
|                     |                    | (n=117)              | (n=47) | (n=12)                   | (n=6)    | (n=7)             | (n=12) | (n=201) |                      | %*      |
| Family type         |                    |                      |        |                          |          |                   |        |         |                      | p=0.372 |
| Two parents         | 936                | 112                  | 47     | 12                       | 6        | 6                 | 12     | 195     | 20.8                 |         |
| Single parent       | 40                 | 5                    | 0      | 0                        | 0        | 1                 | 0      | 6       | 15.0                 |         |
| Age of mother       |                    |                      |        |                          |          |                   |        |         |                      | p=0.635 |
| <29 years           | 109                | 15                   | 5      | 0                        | 4        | 0                 | 2      | 26      | 23.9                 |         |
| 30–39 years         | 579                | 64                   | 28     | 8                        | 2        | 5                 | 8      | 115     | 19.9                 |         |
| ≥40 years           | 288                | 38                   | 14     | 4                        | 0        | 2                 | 2      | 60      | 20.8                 |         |
| Age of father       |                    |                      |        |                          |          |                   |        |         |                      | p=0.940 |
| <29 years           | 68                 | 9                    | 3      | 0                        | 1        | 0                 | 1      | 14      | 20.6                 |         |
| 30–39 years         | 462                | 55                   | 22     | 6                        | 3        | 2                 | 5      | 93      | 20.1                 |         |
| ≥40 years           | 446                | 53                   | 22     | 6                        | 2        | 5                 | 6      | 94      | 21.1                 |         |
| Education of mother |                    |                      |        |                          |          |                   |        |         |                      | p=0.160 |
| High school         | 277                | 33                   | 15     | 2                        | 2        | 2                 | 4      | 58      | 20.9                 |         |

|    |                               |     |    |    |   |   |   |    |     |      |         |
|----|-------------------------------|-----|----|----|---|---|---|----|-----|------|---------|
| 1  |                               |     |    |    |   |   |   |    |     |      |         |
| 2  |                               |     |    |    |   |   |   |    |     |      |         |
| 3  |                               |     |    |    |   |   |   |    |     |      |         |
| 4  |                               |     |    |    |   |   |   |    |     |      |         |
| 5  |                               |     |    |    |   |   |   |    |     |      |         |
| 6  |                               |     |    |    |   |   |   |    |     |      |         |
| 7  |                               |     |    |    |   |   |   |    |     |      |         |
| 8  |                               |     |    |    |   |   |   |    |     |      |         |
| 9  | Business technical            |     |    |    |   |   |   |    |     |      |         |
| 10 | school or junior              | 351 | 48 | 22 | 3 | 1 | 4 | 4  | 82  | 23.4 |         |
| 11 | college                       |     |    |    |   |   |   |    |     |      |         |
| 12 |                               |     |    |    |   |   |   |    |     |      |         |
| 13 |                               |     |    |    |   |   |   |    |     |      |         |
| 14 | College                       | 348 | 36 | 10 | 7 | 3 | 1 | 4  | 61  | 17.5 |         |
| 15 | Education of father           |     |    |    |   |   |   |    |     |      | p=0.200 |
| 16 | High school                   | 281 | 39 | 20 | 3 | 1 | 3 | 2  | 68  | 24.2 |         |
| 17 |                               |     |    |    |   |   |   |    |     |      |         |
| 18 |                               |     |    |    |   |   |   |    |     |      |         |
| 19 | Business technical            |     |    |    |   |   |   |    |     |      |         |
| 20 | school or junior              | 150 | 20 | 6  | 2 | 0 | 0 | 2  | 30  | 20.0 |         |
| 21 | college                       |     |    |    |   |   |   |    |     |      |         |
| 22 |                               |     |    |    |   |   |   |    |     |      |         |
| 23 |                               |     |    |    |   |   |   |    |     |      |         |
| 24 | College                       | 545 | 58 | 21 | 7 | 5 | 4 | 8  | 103 | 18.9 |         |
| 25 | Number of children            |     |    |    |   |   |   |    |     |      | p=0.138 |
| 26 | 1                             | 375 | 44 | 11 | 3 | 2 | 1 | 4  | 65  | 17.3 |         |
| 27 | 2                             | 447 | 53 | 26 | 7 | 4 | 4 | 7  | 101 | 22.6 |         |
| 28 | ≥3                            | 154 | 20 | 10 | 2 | 0 | 2 | 1  | 35  | 22.7 |         |
| 29 |                               |     |    |    |   |   |   |    |     |      |         |
| 30 |                               |     |    |    |   |   |   |    |     |      |         |
| 31 | Infant (<1 year old)          |     |    |    |   |   |   |    |     |      | p=0.403 |
| 32 | Yes                           | 170 | 19 | 6  | 3 | 2 | 0 | 1  | 31  | 18.2 |         |
| 33 | No                            | 806 | 98 | 41 | 9 | 4 | 7 | 11 | 170 | 21.1 |         |
| 34 |                               |     |    |    |   |   |   |    |     |      |         |
| 35 | Older siblings (>6 years old) |     |    |    |   |   |   |    |     |      | p=0.330 |
| 36 | Yes                           | 374 | 47 | 22 | 5 | 1 | 4 | 4  | 83  | 22.2 |         |
| 37 | No                            | 602 | 70 | 25 | 7 | 5 | 3 | 8  | 118 | 19.6 |         |
| 38 |                               |     |    |    |   |   |   |    |     |      |         |
| 39 |                               |     |    |    |   |   |   |    |     |      |         |
| 40 |                               |     |    |    |   |   |   |    |     |      |         |
| 41 |                               |     |    |    |   |   |   |    |     |      |         |
| 42 |                               |     |    |    |   |   |   |    |     |      |         |
| 43 |                               |     |    |    |   |   |   |    |     |      |         |
| 44 |                               |     |    |    |   |   |   |    |     |      |         |
| 45 |                               |     |    |    |   |   |   |    |     |      |         |
| 46 |                               |     |    |    |   |   |   |    |     |      |         |
| 47 |                               |     |    |    |   |   |   |    |     |      |         |



14

|    |                                                   |     |     |    |    |   |   |    |     |      |         |
|----|---------------------------------------------------|-----|-----|----|----|---|---|----|-----|------|---------|
| 8  | Living with grandmother                           |     |     |    |    |   |   |    |     |      | p=0.933 |
| 9  | Yes                                               | 128 | 14  | 7  | 0  | 1 | 1 | 3  | 26  | 20.3 |         |
| 10 | No                                                | 848 | 103 | 40 | 12 | 5 | 6 | 9  | 175 | 20.6 |         |
| 11 | Living with grandfather                           |     |     |    |    |   |   |    |     |      | p=0.466 |
| 12 | Yes                                               | 362 | 47  | 19 | 4  | 2 | 1 | 6  | 79  | 21.8 |         |
| 13 | No                                                | 614 | 70  | 28 | 8  | 4 | 6 | 6  | 122 | 19.9 |         |
| 14 | Mother's employment status                        |     |     |    |    |   |   |    |     |      | p=0.574 |
| 15 | Employed                                          | 391 | 52  | 19 | 3  | 1 | 4 | 5  | 84  | 21.5 |         |
| 16 | Unemployed                                        | 585 | 65  | 28 | 9  | 5 | 3 | 7  | 117 | 20.0 |         |
| 17 | Father's employment status                        |     |     |    |    |   |   |    |     |      | p=0.463 |
| 18 | Employed                                          | 964 | 114 | 47 | 12 | 6 | 7 | 12 | 198 | 20.5 |         |
| 19 | Unemployed                                        | 12  | 3   | 0  | 0  | 0 | 0 | 0  | 3   | 25.0 |         |
| 20 | Use of sitter, kindergarten, or<br>nursery school |     |     |    |    |   |   |    |     |      | p=0.143 |
| 21 | Yes                                               | 197 | 32  | 9  | 2  | 0 | 2 | 3  | 48  | 24.4 |         |
| 22 | No                                                | 779 | 85  | 38 | 10 | 6 | 5 | 9  | 153 | 19.6 |         |
| 23 | Type of housing                                   |     |     |    |    |   |   |    |     |      | p=0.554 |
| 24 | House                                             | 516 | 66  | 28 | 2  | 2 | 4 | 8  | 110 | 21.3 |         |
| 25 | Apartment                                         | 460 | 51  | 19 | 10 | 4 | 3 | 4  | 91  | 19.8 |         |
| 26 | Annual income (Yen)                               |     |     |    |    |   |   |    |     |      | p=0.855 |
| 27 | <3 million                                        | 117 | 15  | 5  | 2  | 0 | 1 | 2  | 25  | 21.4 |         |
| 28 | 3–5 million                                       | 366 | 48  | 17 | 2  | 4 | 2 | 5  | 78  | 21.3 |         |

1  
2  
3  
4  
5  
6  
7  
8  
9  
10  
11  
12  
13  
14  
15  
16  
17  
18  
19  
20  
21  
22  
23  
24  
25  
26  
27  
28  
29  
30  
31  
32  
33  
34  
35  
36  
37  
38  
39  
40  
41  
42  
43  
44  
45  
46  
47

|            |     |    |    |   |   |   |   |    |      |
|------------|-----|----|----|---|---|---|---|----|------|
| >5 million | 493 | 54 | 25 | 8 | 2 | 4 | 5 | 98 | 19.9 |
|------------|-----|----|----|---|---|---|---|----|------|

182 ※ The proportion of the total number of unintentional injuries to the overall number of each socioeconomic factor

183 † The Pearson's chi-squared test or Fisher's exact test for total number of unintentional injuries

For peer review only

Table 4. Timing of unintentional injuries among children and socioeconomic factors

| Factors                                        | Overall<br>(n=976) | Unintentional injury                  |                                        |                   |                  |
|------------------------------------------------|--------------------|---------------------------------------|----------------------------------------|-------------------|------------------|
|                                                |                    | Daytime<br>on a<br>weekday<br>(n=106) | Nighttime<br>on a<br>weekday<br>(n=64) | Holiday<br>(n=31) | Total<br>(n=201) |
| Family type                                    |                    |                                       |                                        |                   |                  |
| Two parents                                    | 936                | 102                                   | 62                                     | 31                | 195              |
| Single parent                                  | 40                 | 4                                     | 2                                      | 0                 | 6                |
| Age of mother                                  |                    |                                       |                                        |                   |                  |
| <29 years                                      | 109                | 14                                    | 8                                      | 4                 | 26               |
| 30–39 years                                    | 579                | 65                                    | 32                                     | 18                | 115              |
| ≥40 years                                      | 288                | 27                                    | 24                                     | 9                 | 60               |
| Age of father                                  |                    |                                       |                                        |                   |                  |
| <29 years                                      | 68                 | 9                                     | 4                                      | 1                 | 14               |
| 30–39 years                                    | 462                | 52                                    | 26                                     | 15                | 93               |
| ≥40 years                                      | 446                | 45                                    | 34                                     | 15                | 94               |
| Education of mother                            |                    |                                       |                                        |                   |                  |
| High school                                    | 277                | 29                                    | 20                                     | 9                 | 58               |
| Business technical school<br>or junior college | 351                | 43                                    | 25                                     | 14                | 82               |
| College                                        | 348                | 34                                    | 19                                     | 8                 | 61               |
| Education of father                            |                    |                                       |                                        |                   |                  |
| High school                                    | 281                | 34                                    | 22                                     | 12                | 68               |
| Business technical school<br>or junior college | 150                | 19                                    | 8                                      | 3                 | 30               |
| College                                        | 545                | 53                                    | 34                                     | 16                | 103              |
| Number of children                             |                    |                                       |                                        |                   |                  |
| 1                                              | 375                | 37                                    | 19                                     | 9                 | 65               |
| 2                                              | 447                | 50                                    | 34                                     | 17                | 101              |
| ≥3                                             | 154                | 19                                    | 11                                     | 5                 | 35               |
| Infant (<1 year old)                           |                    |                                       |                                        |                   |                  |
| Yes                                            | 170                | 23                                    | 7                                      | 1                 | 31               |
| No                                             | 806                | 83                                    | 57                                     | 30                | 170              |

|                                                |     |     |    |    |     |
|------------------------------------------------|-----|-----|----|----|-----|
| Older siblings (>6 years old)                  |     |     |    |    |     |
| Yes                                            | 374 | 43  | 24 | 16 | 83  |
| No                                             | 602 | 63  | 40 | 15 | 118 |
| Living with grandmother                        |     |     |    |    |     |
| Yes                                            | 128 | 13  | 7  | 6  | 26  |
| No                                             | 848 | 93  | 57 | 25 | 175 |
| Living with grandfather                        |     |     |    |    |     |
| Yes                                            | 362 | 44  | 26 | 9  | 79  |
| No                                             | 614 | 62  | 38 | 22 | 122 |
| Mother's employment status                     |     |     |    |    |     |
| Employed                                       | 391 | 35  | 33 | 16 | 84  |
| Unemployed                                     | 585 | 71  | 31 | 15 | 117 |
| Father's employment status                     |     |     |    |    |     |
| Employed                                       | 964 | 104 | 63 | 31 | 198 |
| Unemployed                                     | 12  | 2   | 1  | 0  | 3   |
| Use of sitter, kindergarten, or nursery school |     |     |    |    |     |
| Yes                                            | 197 | 16  | 21 | 11 | 48  |
| No                                             | 779 | 90  | 43 | 20 | 153 |
| Type of housing                                |     |     |    |    |     |
| House                                          | 516 | 59  | 34 | 17 | 110 |
| Apartment                                      | 460 | 47  | 30 | 14 | 91  |
| Annual income (Yen)                            |     |     |    |    |     |
| <3 million                                     | 117 | 15  | 9  | 1  | 25  |
| 3–5 million                                    | 366 | 42  | 23 | 13 | 78  |
| >5 million                                     | 493 | 49  | 32 | 17 | 98  |

Table 5. Management after unintentional injuries among children and socioeconomic factors

| Factors     | Overall (n=976) | Unintentional injury   |                            |              | Total (n=201) |
|-------------|-----------------|------------------------|----------------------------|--------------|---------------|
|             |                 | Visit hospital (n=112) | Observation at home (n=88) | others (n=1) |               |
| Family type |                 |                        |                            |              |               |
| Two parents | 936             | 109                    | 85                         | 1            | 195           |

|    |                               |     |    |    |   |     |
|----|-------------------------------|-----|----|----|---|-----|
| 1  |                               |     |    |    |   |     |
| 2  |                               |     |    |    |   |     |
| 3  |                               |     |    |    |   |     |
| 4  |                               |     |    |    |   |     |
| 5  | Single parent                 | 40  | 3  | 3  | 0 | 6   |
| 6  | Age of mother                 |     |    |    |   |     |
| 7  | <29 years                     | 109 | 8  | 18 | 0 | 26  |
| 8  | 30–39 years                   | 579 | 63 | 52 | 0 | 115 |
| 9  | ≥40 years                     | 288 | 41 | 18 | 1 | 60  |
| 10 | Age of father                 |     |    |    |   |     |
| 11 | <29 years                     | 68  | 5  | 9  | 0 | 14  |
| 12 | 30–39 years                   | 462 | 51 | 42 | 0 | 93  |
| 13 | ≥40 years                     | 446 | 56 | 37 | 1 | 94  |
| 14 | Education of mother           |     |    |    |   |     |
| 15 | High school                   | 277 | 27 | 30 | 0 | 58  |
| 16 | Business technical            |     |    |    |   |     |
| 17 | school or junior college      | 351 | 53 | 29 | 0 | 82  |
| 18 | College                       | 348 | 32 | 29 | 1 | 61  |
| 19 | Education of father           |     |    |    |   |     |
| 20 | High school                   | 281 | 39 | 28 | 1 | 68  |
| 21 | Business technical            |     |    |    |   |     |
| 22 | school or junior college      | 150 | 19 | 11 | 0 | 30  |
| 23 | College                       | 545 | 54 | 49 | 0 | 103 |
| 24 | Number of children            |     |    |    |   |     |
| 25 | 1                             | 375 | 26 | 38 | 1 | 65  |
| 26 | 2                             | 447 | 61 | 40 | 0 | 101 |
| 27 | ≥3                            | 154 | 25 | 10 | 0 | 35  |
| 28 | Infant (<1 year old)          |     |    |    |   |     |
| 29 | Yes                           | 170 | 13 | 18 | 0 | 31  |
| 30 | No                            | 806 | 99 | 70 | 1 | 170 |
| 31 | Older siblings (>6 years old) |     |    |    |   |     |
| 32 | Yes                           | 374 | 55 | 28 | 0 | 83  |
| 33 | No                            | 602 | 57 | 60 | 1 | 118 |
| 34 | Living with grandmother       |     |    |    |   |     |
| 35 | Yes                           | 128 | 13 | 13 | 0 | 26  |
| 36 | No                            | 848 | 99 | 75 | 1 | 175 |
| 37 |                               |     |    |    |   |     |
| 38 |                               |     |    |    |   |     |
| 39 |                               |     |    |    |   |     |
| 40 |                               |     |    |    |   |     |
| 41 |                               |     |    |    |   |     |
| 42 |                               |     |    |    |   |     |
| 43 |                               |     |    |    |   |     |
| 44 |                               |     |    |    |   |     |
| 45 |                               |     |    |    |   |     |
| 46 |                               |     |    |    |   |     |
| 47 |                               |     |    |    |   |     |
| 48 |                               |     |    |    |   |     |
| 49 |                               |     |    |    |   |     |
| 50 |                               |     |    |    |   |     |
| 51 |                               |     |    |    |   |     |
| 52 |                               |     |    |    |   |     |
| 53 |                               |     |    |    |   |     |
| 54 |                               |     |    |    |   |     |
| 55 |                               |     |    |    |   |     |
| 56 |                               |     |    |    |   |     |
| 57 |                               |     |    |    |   |     |
| 58 |                               |     |    |    |   |     |
| 59 |                               |     |    |    |   |     |
| 60 |                               |     |    |    |   |     |

|    |                                         |     |     |    |       |
|----|-----------------------------------------|-----|-----|----|-------|
| 1  |                                         |     |     |    |       |
| 2  |                                         |     |     |    |       |
| 3  |                                         |     |     |    |       |
| 4  |                                         |     |     |    |       |
| 5  | Living with grandfather                 |     |     |    |       |
| 6  | Yes                                     | 362 | 44  | 35 | 0 79  |
| 7  | No                                      | 614 | 68  | 53 | 1 122 |
| 8  |                                         |     |     |    |       |
| 9  | Mother's employment status              |     |     |    |       |
| 10 | Employed                                | 391 | 53  | 31 | 0 84  |
| 11 | Unemployed                              | 585 | 59  | 57 | 1 117 |
| 12 |                                         |     |     |    |       |
| 13 | Father's employment status              |     |     |    |       |
| 14 | Employed                                | 964 | 110 | 87 | 1 198 |
| 15 | Unemployed                              | 12  | 2   | 1  | 0 3   |
| 16 |                                         |     |     |    |       |
| 17 | Use of sitter, kindergarten, or nursery |     |     |    |       |
| 18 | school                                  |     |     |    |       |
| 19 | Yes                                     | 197 | 32  | 16 | 0 48  |
| 20 | No                                      | 779 | 80  | 72 | 1 153 |
| 21 |                                         |     |     |    |       |
| 22 | Type of housing                         |     |     |    |       |
| 23 | House                                   | 516 | 73  | 37 | 0 110 |
| 24 | Apartment                               | 460 | 39  | 51 | 1 91  |
| 25 |                                         |     |     |    |       |
| 26 | Annual income (Yen)                     |     |     |    |       |
| 27 | <3 million                              | 117 | 14  | 11 | 0 25  |
| 28 | 3–5 million                             | 366 | 36  | 41 | 1 78  |
| 29 | >5 million                              | 493 | 62  | 36 | 0 98  |
| 30 |                                         |     |     |    |       |
| 31 |                                         |     |     |    |       |
| 32 |                                         |     |     |    |       |

184

Table 6. Logistic regression models of socioeconomic indicators and unintentional injuries

| Factors       | Odds ratio | 95% CI      | p-value |
|---------------|------------|-------------|---------|
| Family type   | 0.60       | (0.23–1.53) | 0.283   |
| Age of mother |            |             | 0.433   |
| <29 years     | 1          | (reference) |         |
| 30–39 years   | 0.68       | (0.37–1.22) | 0.196   |
| ≥40 years     | 0.69       | (0.34–1.37) | 0.285   |
| Age of father |            |             | 0.849   |
| <29 years     | 1          | (reference) |         |

|                                                |      |             |       |
|------------------------------------------------|------|-------------|-------|
| 30–39 years                                    | 1.23 | (0.58–2.61) | 0.596 |
| ≥40 years                                      | 1.27 | (0.56–2.85) | 0.570 |
| Education of mother                            |      |             | 0.284 |
| High school                                    | 1    | (reference) |       |
| Business technical school or junior college    | 1.20 | (0.82–1.82) | 0.334 |
| College                                        | 0.90 | (0.57–1.40) | 0.629 |
| Education of father                            |      |             | 0.504 |
| High school                                    | 1    | (reference) |       |
| Business technical school or junior college    | 0.78 | (0.47–1.29) | 0.339 |
| College                                        | 0.81 | (0.54–1.21) | 0.299 |
| Number of children                             |      |             | 0.168 |
| 1                                              | 1    | (reference) |       |
| 2                                              | 1.51 | (0.98–2.31) | 0.059 |
| ≥3                                             | 1.49 | (0.79–2.79) | 0.215 |
| Infant (<1 year old)                           | 0.78 | (0.49–1.23) | 0.278 |
| Older siblings (>6 years old)                  | 0.91 | (0.58–1.43) | 0.682 |
| Living with grandmother                        | 0.87 | (0.52–1.47) | 0.606 |
| Living with grandfather                        | 1.17 | (0.83–1.65) | 0.383 |
| Mother's employment status                     | 0.99 | (0.67–1.47) | 0.976 |
| Father's employment status                     | 0.79 | (0.20–3.12) | 0.737 |
| Use of sitter, kindergarten, or nursery school | 1.38 | (0.88–2.16) | 0.165 |
| Type of housing                                | 0.97 | (0.69–1.36) | 0.836 |
| Annual income (Yen)                            |      |             | 0.849 |
| <3 million                                     | 1    | (reference) |       |

|             |      |             |       |
|-------------|------|-------------|-------|
| 3–5 million | 0.99 | (0.58–1.69) | 0.977 |
| >5 million  | 0.90 | (0.53–1.53) | 0.701 |

---

185

186 **DISCUSSION**

187           Herein, we observed that unintentional injuries among preschool children  
 188 under 6 years old occurred at approximately constant rates and were unrelated to  
 189 any socioeconomic factors in Japan. Socioeconomic disadvantages did not  
 190 significantly increase the risk for unintentional injuries among preschool children.

191           Our data showed that households whose annual income was under 3  
 192 million yen accounted for 12.0% of the population, whereas the relative poverty  
 193 rate for households with children was 12.9% in Japan.<sup>17</sup> The incidence rate of  
 194 unintentional injuries observed in our study is not very different from that reported  
 195 in other studies: 29.0 injuries per 100 children over a period of 1 year within a  
 196 population of 0–4-year-old children in a Greek town and 17.4 medically treated  
 197 injuries within a population of 0–4-year-old children and adolescents in a health  
 198 maintenance organization.<sup>8 19</sup>

199           Nevertheless, our results differ from the outcomes reported in other  
 200 studies of the relationship between unintentional injuries and socioeconomic  
 201 factors.<sup>7 10 12</sup> There are several explanations for these results. First, the younger  
 202 age of children may affect the relationship between the risk for unintentional  
 203 injuries and socioeconomic factors. A previous study showed very minor  
 204 socioeconomic differences in the injury risk among 0–4-year-old children in  
 205 Sweden.<sup>20</sup> However, socioeconomic differences were observed for traffic injury  
 206 risk from the age of 5 years onwards.<sup>20</sup> Another study reported that the relative  
 207 risk of being injured in a road traffic incident is higher for 5–19-year-olds belonging



1  
2  
3  
4  
5 208 to a low social class than for those belonging to other social classes.<sup>21</sup>  
6  
7 209 Alternatively, caregiver supervision might modify the association between  
8  
9 210 unintentional injury and socioeconomic factors in younger ages, because the  
10  
11 211 proportion of injuries witnessed by caregivers was high in our study. A previous  
12  
13 212 study suggested lack of supervision made children under 5 years at risk of high  
14  
15 213 mortality by unintentional injuries.<sup>22</sup> Therefore, the age of the children, which was  
16  
17 214 under 6 years old in our study, might help to decrease the risk of unintentional  
18  
19 215 injuries in lower socioeconomic classes. Second, the following characteristics  
20  
21 216 specific to Japan might reduce the socioeconomic differences: relatively low  
22  
23 217 exposure to environmental hazards, the social support network, and ethnic  
24  
25 218 homogeneity.<sup>23</sup> The absolute number of traffic accidents in Japan has gradually  
26  
27 219 decreased from 887000 in 2006 to 499000 in 2016, owing to new road traffic laws  
28  
29 220 and improvements in the quality of roads, vehicle engineering, and driver  
30  
31 221 behavior.<sup>24 25</sup> The Japanese government provides households with children's  
32  
33 222 allowances according to income, employment, or financial support for single  
34  
35 223 parent families, and visits for all families with infants.<sup>26</sup> All municipalities in Japan  
36  
37 224 conduct health checkups at healthcare centers for children aged 18–23 months  
38  
39 225 and children aged 36–47 months, despite socioeconomic differences. The mean  
40  
41 226 response rate for these health checkups is over 90%.<sup>27</sup>

42  
43 227 Taken together, our data and those from previous studies, confirm that  
44  
45 228 the relationship between unintentional injury and socioeconomic factors differs for  
46  
47 229 each nation.<sup>7 8 10 11</sup> It is difficult to generalize the influence of socioeconomic  
48  
49 230 factors on the risk of unintentional childhood injuries. Therefore, prevention  
50  
51 231 strategies should vary from country to country. In Japan, prevention strategies  
52  
53 232 that focus on socioeconomic disadvantages would be inadequate. A  
54  
55 233 comprehensive approach that involves health checkups could be a useful method

1  
2  
3  
4  
5 234 for prevention of unintentional injuries.

6  
7 235

8  
9 236 **Limitations**

10  
11 237 This study had several limitations. First, only those households that had

12  
13  
14 238 access to the internet were included. However, we selected households with a

15  
16  
17 239 population distribution similar to that in the national census. We had a high

18  
19  
20 240 internet penetration rate of the general population (83.5%) in Japan.<sup>28</sup> In addition,

21  
22  
23 241 there were no differences between the relative poverty rates recorded in our study

24  
25  
26 242 and those for the whole nation. Second, the outcome measures were based on

27  
28  
29 243 self-reporting. The respondents may have been unaware of incidences of

30  
31  
32 244 unintentional injury, or recalled the accident inaccurately. Thus, the incidence of

33  
34  
35 245 unintentional injury might be underestimated. However, the incident rates

36  
37  
38 246 recorded in our study are not very different from those obtained in other studies.

39  
40  
41 247 Third, although we excluded households which had missing information regarding

42  
43  
44 248 parent education and type of housing, this might have resulted in bias due to

45  
46  
47 249 missing data. However, we excluded only 24 households. Additionally, the risk of

48  
49  
50 250 unintentional injury was similar, despite of the high proportion of single parents in

51  
52  
53 251 the missing data. Thus, it might not impact the validity of the conclusion. Finally,

54  
55  
56 252 our inferences might be confounded by unmeasured factors, such as gender,

1  
2  
3  
4  
5  
6 253 mental health conditions, and physical disability of the children. Future studies  
7  
8  
9 254 should measure the non-socioeconomic factors relating to unintentional injuries  
10  
11  
12 255 among children more explicitly.

13 256

14  
15 257 **Conclusion**

16  
17 258 Unintentional injuries among preschool children occurred at approximately  
18  
19 259 constant rates irrespective of the presence of socioeconomic factors. The  
20  
21 260 association between socioeconomic factors and unintentional injury varies across  
22  
23 261 different countries. Prevention strategies aimed at unintentional injuries that take  
24  
25 262 socioeconomic disadvantages into consideration may not be applicable in Japan.  
26

27 263  
28  
29  
30  
31  
32  
33  
34  
35  
36  
37  
38  
39  
40  
41  
42  
43  
44  
45  
46  
47  
48  
49  
50  
51  
52  
53  
54  
55  
56  
57  
58  
59  
60

1  
2  
3  
4  
5 264 **CONTRIBUTORSHIP STATEMENT**

6  
7 265 NS conceived the study. YH, JI, and KA supervised the conduct of the  
8  
9 266 trial and data collection. NS managed the data, including quality control. KA  
10  
11 267 provided statistical advice on the study design and analyzed the data; NS chaired  
12  
13 268 the data oversight committee. NS, YH, and KA drafted the manuscript, and all  
14  
15 269 authors contributed substantially to its revision. NS takes responsibility for the  
16  
17 270 paper as a whole. All authors read and approved the final manuscript.

18  
19 271

20  
21 272 **COMPETING INTERESTS**

22  
23 273 None declared.

24  
25 274

26  
27 275 **FUNDING**

28  
29 276 This research received no specific grant from any funding agency in the  
30  
31 277 public, commercial or not-for-profit sectors.

32  
33 278

34  
35 279 **DATA SHARING STATEMENT**

36  
37 280 The database set was available for all authors of the study, and will be available  
38  
39 281 for other non-commercial researchers on request.

282 **References**

- 283 1. Alonge O, Khan UR, Hyder AA. Our Shrinking Globe: Implications for Child  
284 Unintentional Injuries. *Pediatr Clin North Am* 2016;63:167–81.
- 285 2. Alonge O, Hyder AA. Reducing the global burden of childhood  
286 unintentional injuries. *Arch Dis Child* 2014;99:62–9.
- 287 3. Hyder AA, Wali S, Fishman S, et al. The burden of unintentional injuries  
288 among the under-five population in South Asia. *Acta Paediatr*  
289 2008;97:267–75.
- 290 4. Krug EG, Sharma GK, Lozano R. The global burden of injuries. *Am J*  
291 *Public Health* 2000;90:523–6.
- 292 5. Peden M, Oyegbite K, Ozanne-Smith J, et al. *World Report on Child Injury*  
293 *Prevention*. Geneva: World Health Organization, 2008.
- 294 6. Nathens AB, Neff MJ, Goss CH, et al. Effect of an older sibling and birth  
295 interval on the risk of childhood injury. *Inj Prev* 2000;6:219–22.
- 296 7. Hjern A, Ringback-Weitof G, Andersson R. Socio-demographic risk  
297 factors for home-type injuries in Swedish infants and toddlers. *Acta*  
298 *Paediatr* 2001;90:61–8.
- 299 8. Petridou E, Anastasiou A, Katsiardanis K, et al. A prospective  
300 population-based study of childhood injuries: the Velestino town study. *Eur*  
301 *J Public Health* 2005;15:9–14.
- 302 9. Weitof GR, Hjern A, Haglund B, et al. Mortality, severe morbidity, and  
303 injury in children living with single parents in Sweden: a population-based  
304 study. *Lancet* 2003;361:289–95.
- 305 10. Laursen B, Nielsen JW. Influence of sociodemographic factors on the risk  
306 of unintentional childhood home injuries. *Eur J Public Health* 2008;18:366–  
307 70.

- 1  
2  
3  
4  
5 308 11. Faelker T, Pickett W, Brison RJ. Socioeconomic differences in childhood  
6  
7 309 injury: a population-based epidemiologic study in Ontario, Canada. *Inj*  
8  
9 310 *Prev* 2000;6:203–8.
- 10  
11 311 12. Laflamme L, Diderichsen F. Social differences in traffic injury risks in  
12  
13 312 childhood and youth--a literature review and a research agenda. *Inj Prev*  
14  
15 313 2000;6:293–8.
- 16  
17 314 13. de Lourdes Drachler M, de Carvalho Leite JC, Marshall T, et al. Effects of  
18  
19 315 the home environment on unintentional domestic injuries and related  
20  
21 316 health care attendance in infants. *Acta Paediatr* 2007;96:1169–73.
- 22  
23 317 14. Sekii H, Ohtsu T, Shirasawa T, et al. Childhood mortality due to  
24  
25 318 unintentional injuries in Japan, 2000–2009. *Int J Environ Res Public Health*  
26  
27 319 2013;10:528–40.
- 28  
29 320 15. Director-General for statistics and information policy, Ministry of Health,  
30  
31 321 Labour and Welfare. Vital statistics in Japan. Trends up to 2015.  
32  
33 322 <http://www.mhlw.go.jp/english/database/db-hw/dl/81-1a2en.pdf> (accessed  
34  
35 323 20 Nov 2017).
- 36  
37 324 16. OECD Rights and Translation Unit. Growing Unequal? Income Distribution  
38  
39 325 and Poverty in OECD Countries. Paris: OECD publications 2008.
- 40  
41 326 17. Ministry of Health, Labour and Welfare. Comprehensive Survey of Living  
42  
43 327 Conditions of the People on Health and Welfare. Tokyo: Ministry of Health,  
44  
45 328 Labour and Welfare 2016.
- 46  
47 329 18. Fujiwara T, Yamaoka Y, Morisaki N. Self-Reported Prevalence and Risk  
48  
49 330 Factors for Shaking and Smothering Among Mothers of 4-Month-Old  
50  
51 331 Infants in Japan. *J Epidemiol* 2016;26:4-13.
- 52  
53 332 19. Rivara FP, Calonge N, Thompson RS. Population-based study of  
54  
55 333 unintentional injury incidence and impact during childhood. *Am J Public*

- 1  
2  
3  
4  
5 334 *Health* 1989;79:990–4.  
6  
7 335 20. Engstrom K, Diderichsen F, Laflamme L. Socioeconomic differences in  
8  
9 336 injury risks in childhood and adolescence: a nation-wide study of  
10  
11 337 intentional and unintentional injuries in Sweden. *Inj Prev* 2002;8:137–42.  
12  
13 338 21. Laflamme L, Engstrom K. Socioeconomic differences in Swedish children  
14  
15 339 and adolescents injured in road traffic incidents: cross sectional study.  
16  
17 340 *BMJ* 2002;324:396–7.  
18  
19 341 22. Khatlani K, Alonge O, Rahman A, et al. Caregiver Supervision Practices  
20  
21 342 and Risk of Childhood Unintentional Injury Mortality in Bangladesh. *Int J*  
22  
23 343 *Environ Res Public Health* 2017;14(5).  
24  
25 344 23. Kagamimori S, Gaina A, Nasermoaddeli A. Socioeconomic status and  
26  
27 345 health in the Japanese population. *Soc Sci Med* 2009;68:2152–60.  
28  
29 346 24. Nagata T, Setoguchi S, Hemenway D, et al. Effectiveness of a law to  
30  
31 347 reduce alcohol-impaired driving in Japan. *Inj Prev* 2008;14:19–23.  
32  
33 348 25. National Police Agency. Trends in traffic accidents by year. Tokyo: Traffic  
34  
35 349 accidents situation 2016.  
36  
37 350 26. Ministry of Health, Labour and Welfare. Equal Employment and Child  
38  
39 351 Welfare. Tokyo: Ministry of Health, Labour and Welfare 2015.  
40  
41 352 27. Yamamoto N, Honda C, Nagata S. Current trends and age-based  
42  
43 353 differences of unintentional injury in Japanese children. *Biosci Trends*  
44  
45 354 2016;10:152–7.  
46  
47 355 28. Ministry of Internal Affairs and Communications. Information and  
48  
49 356 Communications in Japan 2017. Tokyo: Ministry of Internal Affairs and  
50  
51 357 Communications 2017.  
52  
53 358

## STROBE Statement—checklist of items that should be included in reports of observational studies

|                              | Item No | Recommendation                                                                                                                                                                                                         | Reported on page # |
|------------------------------|---------|------------------------------------------------------------------------------------------------------------------------------------------------------------------------------------------------------------------------|--------------------|
| <b>Title and abstract</b>    | 1       | (a) Indicate the study's design with a commonly used term in the title or the abstract                                                                                                                                 | P1,2               |
|                              |         | (b) Provide in the abstract an informative and balanced summary of what was done and what was found                                                                                                                    | p2                 |
| <b>Introduction</b>          |         |                                                                                                                                                                                                                        |                    |
| Background/rationale         | 2       | Explain the scientific background and rationale for the investigation being reported                                                                                                                                   | P4                 |
| Objectives                   | 3       | State specific objectives, including any prespecified hypotheses                                                                                                                                                       | P4,5               |
| <b>Methods</b>               |         |                                                                                                                                                                                                                        |                    |
| Study design                 | 4       | Present key elements of study design early in the paper                                                                                                                                                                | P5                 |
| Setting                      | 5       | Describe the setting, locations, and relevant dates, including periods of recruitment, exposure, follow-up, and data collection                                                                                        | P5                 |
| Participants                 | 6       | (a) <i>Cohort study</i> —Give the eligibility criteria, and the sources and methods of selection of participants. Describe methods of follow-up                                                                        | P5                 |
|                              |         | <i>Case-control study</i> —Give the eligibility criteria, and the sources and methods of case ascertainment and control selection. Give the rationale for the choice of cases and controls                             |                    |
|                              |         | <i>Cross-sectional study</i> —Give the eligibility criteria, and the sources and methods of selection of participants                                                                                                  |                    |
|                              |         | (b) <i>Cohort study</i> —For matched studies, give matching criteria and number of exposed and unexposed<br><i>Case-control study</i> —For matched studies, give matching criteria and the number of controls per case |                    |
| Variables                    | 7       | Clearly define all outcomes, exposures, predictors, potential confounders, and effect modifiers. Give diagnostic criteria, if applicable                                                                               | P5, 6              |
| Data sources/<br>measurement | 8*      | For each variable of interest, give sources of data and details of methods of assessment (measurement). Describe comparability of assessment methods if there is more than one group                                   | P5,6               |
| Bias                         | 9       | Describe any efforts to address potential sources of bias                                                                                                                                                              | P5,6               |
| Study size                   | 10      | Explain how the study size was arrived at                                                                                                                                                                              | P6                 |
| Quantitative variables       | 11      | Explain how quantitative variables were handled in the analyses. If applicable, describe which groupings were chosen and why                                                                                           | P6                 |
| Statistical methods          | 12      | (a) Describe all statistical methods, including those used to control for confounding                                                                                                                                  | P6,7               |
|                              |         | (b) Describe any methods used to examine subgroups and interactions                                                                                                                                                    | P6,7               |
|                              |         | (c) Explain how missing data were addressed                                                                                                                                                                            | P5                 |
|                              |         | (d) <i>Cohort study</i> —If applicable, explain how loss to follow-up was addressed<br><i>Case-control study</i> —If applicable, explain how matching of cases and controls was addressed                              | P5                 |



*Cross-sectional study*—If applicable, describe analytical methods taking account of sampling strategy

(e) Describe any sensitivity analyses

| <b>Results</b>           |     |                                                                                                                                                                                                              |              |
|--------------------------|-----|--------------------------------------------------------------------------------------------------------------------------------------------------------------------------------------------------------------|--------------|
| Participants             | 13* | (a) Report numbers of individuals at each stage of study—eg numbers potentially eligible, examined for eligibility, confirmed eligible, included in the study, completing follow-up, and analysed            | P7           |
|                          |     | (b) Give reasons for non-participation at each stage                                                                                                                                                         | P7           |
|                          |     | (c) Consider use of a flow diagram                                                                                                                                                                           |              |
| Descriptive data         | 14* | (a) Give characteristics of study participants (eg demographic, clinical, social) and information on exposures and potential confounders                                                                     | P7           |
|                          |     | (b) Indicate number of participants with missing data for each variable of interest                                                                                                                          | P7           |
|                          |     | (c) <i>Cohort study</i> —Summarise follow-up time (eg, average and total amount)                                                                                                                             |              |
| Outcome data             | 15* | <i>Cohort study</i> —Report numbers of outcome events or summary measures over time                                                                                                                          |              |
|                          |     | <i>Case-control study</i> —Report numbers in each exposure category, or summary measures of exposure                                                                                                         |              |
|                          |     | <i>Cross-sectional study</i> —Report numbers of outcome events or summary measures                                                                                                                           | P7           |
| Main results             | 16  | (a) Give unadjusted estimates and, if applicable, confounder-adjusted estimates and their precision (eg, 95% confidence interval). Make clear which confounders were adjusted for and why they were included | P10,11       |
|                          |     | (b) Report category boundaries when continuous variables were categorized                                                                                                                                    |              |
|                          |     | (c) If relevant, consider translating estimates of relative risk into absolute risk for a meaningful time period                                                                                             |              |
| Other analyses           | 17  | Report other analyses done—eg analyses of subgroups and interactions, and sensitivity analyses                                                                                                               | P16,17,18,19 |
| <b>Discussion</b>        |     |                                                                                                                                                                                                              |              |
| Key results              | 18  | Summarise key results with reference to study objectives                                                                                                                                                     | P21          |
| Limitations              | 19  | Discuss limitations of the study, taking into account sources of potential bias or imprecision. Discuss both direction and magnitude of any potential bias                                                   | P23,24       |
| Interpretation           | 20  | Give a cautious overall interpretation of results considering objectives, limitations, multiplicity of analyses, results from similar studies, and other relevant evidence                                   | P21,22,23    |
| Generalisability         | 21  | Discuss the generalisability (external validity) of the study results                                                                                                                                        | P22,23       |
| <b>Other information</b> |     |                                                                                                                                                                                                              |              |
| Funding                  | 22  | Give the source of funding and the role of the funders for the present study and, if applicable, for the original study on which the present article is based                                                | P25          |

\*Give information separately for cases and controls in case-control studies and, if applicable, for exposed and unexposed groups in cohort and cross-sectional studies.

1  
2  
3  
4  
5  
6  
7  
8  
9  
10  
11  
12  
13  
14  
15  
16  
17  
18  
19  
20  
21  
22  
23  
24  
25  
26  
27  
28  
29  
30  
31  
32  
33  
34  
35  
36  
37  
38  
39  
40  
41  
42  
43  
44  
45  
46  
47

**Note:** An Explanation and Elaboration article discusses each checklist item and gives methodological background and published examples of transparent reporting. The STROBE checklist is best used in conjunction with this article (freely available on the Web sites of PLoS Medicine at <http://www.plosmedicine.org/>, Annals of Internal Medicine at <http://www.annals.org/>, and Epidemiology at <http://www.epidem.com/>). Information on the STROBE Initiative is available at [www.strobe-statement.org](http://www.strobe-statement.org).

For peer review only

# BMJ Open

## Association of socioeconomic factors and the risk for unintentional injuries among children in Japan: a cross-sectional study

|                                 |                                                                                                                                                                                                                                                                                                                                                                                                                                                                                            |
|---------------------------------|--------------------------------------------------------------------------------------------------------------------------------------------------------------------------------------------------------------------------------------------------------------------------------------------------------------------------------------------------------------------------------------------------------------------------------------------------------------------------------------------|
| Journal:                        | <i>BMJ Open</i>                                                                                                                                                                                                                                                                                                                                                                                                                                                                            |
| Manuscript ID                   | bmjopen-2018-021621.R2                                                                                                                                                                                                                                                                                                                                                                                                                                                                     |
| Article Type:                   | Research                                                                                                                                                                                                                                                                                                                                                                                                                                                                                   |
| Date Submitted by the Author:   | 23-Jul-2018                                                                                                                                                                                                                                                                                                                                                                                                                                                                                |
| Complete List of Authors:       | Sato, Nobuhiro; Niigata University Graduate School of Medicine, Department of Medical Informatics and Statistics<br>Hagiwara, Yusuke; Tokyo Metropolitan Children's Medical Center, Department of Pediatric Emergency and Critical Care Medicine<br>Ishikawa, Junta; Niigata University Graduate School of Medicine, Department of Medical Informatics and Statistics<br>Akazawa, Kouhei; Niigata University Graduate School of Medicine, Department of Medical Informatics and Statistics |
| <b>Primary Subject Heading</b>: | Epidemiology                                                                                                                                                                                                                                                                                                                                                                                                                                                                               |
| Secondary Subject Heading:      | Paediatrics, Epidemiology                                                                                                                                                                                                                                                                                                                                                                                                                                                                  |
| Keywords:                       | EPIDEMIOLOGY, PAEDIATRICS, Socioeconomic Status, Risk factor research                                                                                                                                                                                                                                                                                                                                                                                                                      |
|                                 |                                                                                                                                                                                                                                                                                                                                                                                                                                                                                            |

SCHOLARONE™  
Manuscripts

Only

1 Association of socioeconomic factors and the risk for unintentional injuries among  
2 children in Japan: a cross-sectional study

3

4 Nobuhiro Sato<sup>a)</sup>, Yusuke Hagiwara<sup>b)</sup>, Junta Ishikawa<sup>a)</sup>, and Kohei Akazawa<sup>a)</sup>

5

6 <sup>a</sup> Department of Medical Informatics and Statistics, Niigata University Graduate  
7 School of Medicine, Niigata, Japan

8 <sup>b</sup> Department of Pediatric Emergency and Critical Care Medicine, Tokyo  
9 Metropolitan Children's Medical Center, Fuchu, Tokyo, Japan

10

11 **Corresponding author:** Nobuhiro Sato, Department of Medical Informatics and  
12 Statistics, Niigata University Graduate School of Medicine, 1-754 Asahimachi,  
13 Chuo-ku, Niigata 951-8520, Japan. Tel.: +81-25-227-2471. Fax: +81-25-227-0850.  
14 E-mail: [s\\_nobuhiro@hosp.niigata.niigata.jp](mailto:s_nobuhiro@hosp.niigata.niigata.jp).

15

16 **Word count:** 2096

1  
2  
3  
4  
5 **17 ABSTRACT**

6  
7 **18 Objectives:** While Japan has socioeconomic issues, such as income inequality,  
8  
9 **19** little is known about the association between socioeconomic factors and the risk  
10  
11 **20** of unintentional childhood injuries. The purpose of the study was to evaluate the  
12  
13 **21** influence of socioeconomic factors on the risk for unintentional injuries among  
14  
15 **22** preschool children in Japan

16  
17 **23 Design:** Cross-sectional study using data from a web-based questionnaire  
18  
19 **24** survey.

20  
21 **25 Setting:** Japan (January 2015).

22  
23 **26 Participants:** 1000 households with preschool children under 6 years of age.

24  
25 **27 Outcome measures:** Multivariate logistic regression was performed to analyze  
26  
27 **28** the influence of socioeconomic factors on the incidence of unintentional injuries.

28  
29 **29 Results:** Overall, 976 households were eligible for the analysis, with 201  
30  
31 **30** households reporting unintentional injuries. The incidence rates for unintentional  
32  
33 **31** injury were estimated to be constant across all strata constructed using  
34  
35 **32** combinations of socioeconomic factors. The multivariate logistic regression  
36  
37 **33** analysis showed no significant differences in socioeconomic factors between  
38  
39 **34** households that reported unintentional injuries and those that did not.

40  
41 **35 Conclusion:** The findings of our study demonstrated that unintentional injuries  
42  
43 **36** among preschool children occurred at approximately fixed rates, independent of  
44  
45 **37** socioeconomic factors. Accordingly, prevention strategies for unintentional injuries  
46  
47 **38** that concern socioeconomic disadvantages should be avoided in Japan.

48  
49 **39 Keywords:** Epidemiology, Pediatrics, Risk Factor Research, Socioeconomic  
50  
51 **40** Status

52  
53  
54  
55 **42 'Strengths and limitations of this study'**

1  
2  
3  
4  
5  
6  
7  
8  
9  
10  
11  
12  
13  
14  
15  
16  
17  
18  
19  
20  
21  
22  
23  
24  
25  
26  
27  
28  
29  
30  
31  
32  
33  
34  
35  
36  
37  
38  
39  
40  
41  
42  
43  
44  
45  
46  
47  
48  
49  
50  
51  
52  
53  
54  
55  
56  
57  
58  
59  
60

43 A nationwide questionnaire survey administered in Japan.  
44 1000 households with a population distribution similar to that in the national  
45 census were included.  
46 Confounders by unmeasured factors, such as physical disabilities in children, are  
47 study limitations.  
48

For peer review only

1  
2  
3  
4  
5  
6  
7  
8  
9  
10  
11  
12  
13  
14  
15  
16  
17  
18  
19  
20  
21  
22  
23  
24  
25  
26  
27  
28  
29  
30  
31  
32  
33  
34  
35  
36  
37  
38  
39  
40  
41  
42  
43  
44  
45  
46  
47  
48  
49  
50  
51  
52  
53  
54  
55  
56  
57  
58  
59  
60  
61  
62  
63  
64  
65  
66  
67  
68  
69  
70  
71  
72  
73  
74**INTRODUCTION**

Unintentional injuries are a leading cause of death among children of all ages.<sup>1-4</sup>

The term “unintentional injury” in this context is defined as an injury that is not inflicted deliberately; the injury may have been caused by a fall, poisoning, drowning, burns, or traffic-related accidents. Globally, unintentional injuries accounted for 15.4% of approximately 2.6 million deaths recorded for children aged 1 to 14 years in 2013.<sup>1</sup> In particular, children aged 1 to 4 years demonstrate the highest all-cause and cause-specific mortality rates due to unintentional injuries.<sup>1</sup> The risks for unintentional injuries among children are mainly defined by individual factors (behaviors and attributes), the presence or absence of supervision, and safety equipment and vehicle safety<sup>5</sup>. Moreover, the risks can be influenced by socioeconomic factors, including family income, parental education, single parenting, maternal age, older siblings, and type of housing.<sup>6-13</sup> In fact, Laursen et al. reported that children with young mothers and mothers with only primary school education were at higher risk for most types of injuries than other children in Denmark.<sup>10</sup>

Similarly, in Japan, unintentional injuries have been a major cause of death among children aged  $\geq 1$  year since 1960.<sup>14 15</sup> Furthermore, several socioeconomic issues exist in Japan. For example, Japan is ranked fourth highest for income inequality across the Organization for Economic Cooperation and Development (OECD) member countries.<sup>16</sup> The relative poverty rate for households with children was 12.9% in 2015.<sup>17</sup> A previous study revealed the association between socioeconomic inequality and the risk for infant abuse in Japan.<sup>18</sup> However, only a few studies have examined the relationship between socioeconomic status and unintentional injury among children in Japan thus far.

1  
2  
3  
4  
5 75 The purpose of this study was to evaluate the influence of socioeconomic  
6  
7 76 factors on the risk for unintentional injuries among children in Japan via a  
8  
9 77 nationwide questionnaire survey.  
10

11 78

## 12 79 **METHODS**

### 13 80 **Study design and participants**

14  
15  
16  
17 81 This study involved a web-based questionnaire survey. The participants were  
18  
19 82 selected in January 2015 from a database of 1,370,000 candidates compiled by a  
20  
21 83 private Japanese company specializing in questionnaire-based research. We  
22  
23 84 extracted data for 1000 households with preschool children under 6 years of age.  
24  
25 85 All participants lived in Japan. Region was used as a variable for stratified random  
26  
27 86 sampling. Hence, the region-wise distribution of our sample was almost identical  
28  
29 87 to that of the general population in Japan. All respondents completed the  
30  
31 88 questionnaire on a website developed specially for this study by the survey  
32  
33 89 company. Exclusion criteria included not living with parents; missing information  
34  
35 90 regarding parent education and type of housing; and children being cared for by  
36  
37 91 people other than the parents, grandparents, kindergarten teachers, and nursery  
38  
39 92 teachers during the daytime. An urban area was defined as an area with >15  
40  
41 93 million residents. Returning the questionnaire was taken as agreement to  
42  
43 94 participate in the study and informed consent was obtained from all participants.  
44  
45 95 This study was approved by the institutional ethics review board of Niigata City  
46  
47 96 General Hospital.

48 97

### 49 98 **Measures**

50  
51  
52 99 The questionnaire included 20 questions about basic and socioeconomic  
53  
54 100 characteristics and 17 questions concerning unintentional injuries. The following  
55  
56  
57  
58  
59



1  
2  
3  
4  
5 101 socioeconomic factors were used for evaluation: father's age; mother's age; living  
6  
7 102 area; number of siblings; highest education levels of parents; annual income of  
8  
9 103 parents; type of housing; parents' employment status; living with grandparents;  
10  
11 104 primary caregiver during the daytime and at night; use of a sitter, kindergarten, or  
12  
13 105 nursery school; and history of injuries. Parents were divided into three groups  
14  
15 106 according to the mean age of mothers (30.7 years old) at the birth of the first child  
16  
17 107 in Japan:  $\leq 29$  years, 30–39 years,  $\geq 40$  years.<sup>15</sup> Highest education level was  
18  
19 108 classified as junior high school or high school, business technical school or junior  
20  
21 109 college, and college. Annual income was classified as  $< 3$  million yen, 3–5 million  
22  
23 110 yen,  $\geq 5$  million yen, based on the average income in Japan (median 4.28 million  
24  
25 111 yen).<sup>17</sup> Type of housing was divided into house and apartment house categories.  
26  
27 112 Injury was defined as physical damage that was fatal or caused aftereffects. We  
28  
29 113 included the following types of injuries: all injuries, such as falls from stairs or a  
30  
31 114 balcony; burns from hot liquids, hot surfaces, or fire; accidental poisoning; foreign  
32  
33 115 body aspiration or suffocation; drowning; and traffic injuries.<sup>10</sup> The information  
34  
35 116 collected about unintentional injuries included gender of child, time, place of injury,  
36  
37 117 witnessed by others or not, and management after injury. The injury mechanism  
38  
39 118 was defined as the injury that the respondent considered to be the most severe  
40  
41 119 when the child experienced multiple unintentional injuries.  
42

120

## 121 **Statistical Analysis**

122 The sample size calculation was performed on the basis of a statistical power of  
123 80%, two-sided P-value of 0.05, an event rate of 25%, and a relative risk of  
124 socioeconomic disadvantage of 1.2, obtained from previous studies.<sup>8 10 19</sup>

125 Continuous data with skewed distributions are shown as medians and  
126 interquartile ranges, and categorical data as proportions. The Pearson's

1  
2  
3  
4  
5 127 chi-squared test or Fisher's exact test was used to explore the significance of  
6  
7 128 differences between households reporting unintentional injuries and those that did  
8  
9 129 not report any injuries.

10  
11 130 Multiple logistic regression analysis was used to estimate the odds ratios and  
12  
13 131 95% confidence intervals (CIs) after controlling simultaneously for potential  
14  
15 132 confounders. We used unintentional injury as the dependent variable. We  
16  
17 133 included 15 significant risk factors in the analysis (family type, age of parents,  
18  
19 134 education of parents, number of children, presence of infant or older siblings,  
20  
21 135 living with grandparent, parents' employment status, use of sitter, kindergarten, or  
22  
23 136 nursery school, type of housing, and annual income). All statistical tests were  
24  
25 137 two-sided. A p-value less than 0.05 was considered statistically significant. Data  
26  
27 138 analysis was performed using SPSS, version 23.0 (IBM Corporation, Armonk, NY,  
28  
29 139 USA).

30  
31 140

#### 32 141 **Patient and Public Involvement**

33  
34  
35 142 Patients and public were not involved in the design of the study.  
36  
37  
38  
39  
40  
41  
42  
43  
44  
45  
46  
47  
48  
49  
50  
51  
52  
53  
54  
55  
56  
57  
58  
59  
60

143

144 **RESULTS**145 **Characteristics of the study population**

146 Of the 1000 households that participated in this study, 24 families were  
 147 excluded because of missing data regarding the parents' education (n=2); type of  
 148 housing (n=17); and primary caregivers apart from parents, grandparents,  
 149 kindergarten teachers, and nursery school teachers during the daytime (n=5).  
 150 Table 1 shows the basic characteristics of the 976 households that were included  
 151 in the study. The median age of the respondents was 38 years (interquartile range  
 152 33–42 years). In total, 201 households reported unintentional injuries among  
 153 children. Table 2 presents the distribution of the 201 unintentionally injured  
 154 children according to injury-descriptive variables. The most frequently observed  
 155 mechanism of injury was falls (58.2%), followed by burns (23.4%),  
 156 poisoning/aspiration (6.0%), drowning (3.0%), traffic injury (3.5%), and others  
 157 (6.0%).

158

Table 1 Characteristics of 976 households with preschool children under 6  
 years old

| Factors           | N=976 | %    |
|-------------------|-------|------|
| <b>Respondent</b> |       |      |
| Mother            | 569   | 58.3 |
| Father            | 407   | 41.7 |
| <b>Region</b>     |       |      |
| Urban area        | 678   | 69.5 |
| Others            | 298   | 30.5 |

|    |                                                |     |      |
|----|------------------------------------------------|-----|------|
| 1  |                                                |     |      |
| 2  |                                                |     |      |
| 3  |                                                |     |      |
| 4  |                                                |     |      |
| 5  | Family type                                    |     |      |
| 6  |                                                |     |      |
| 7  | Two parents                                    | 936 | 95.9 |
| 8  |                                                |     |      |
| 9  | Single parent                                  | 40  | 4.1  |
| 10 |                                                |     |      |
| 11 | Number of children                             |     |      |
| 12 |                                                |     |      |
| 13 | 1                                              | 375 | 38.4 |
| 14 |                                                |     |      |
| 15 | 2                                              | 447 | 45.8 |
| 16 |                                                |     |      |
| 17 | ≥3                                             | 154 | 15.8 |
| 18 |                                                |     |      |
| 19 | Living with grandparent                        |     |      |
| 20 |                                                |     |      |
| 21 | Yes                                            | 389 | 39.9 |
| 22 |                                                |     |      |
| 23 | No                                             | 587 | 60.1 |
| 24 |                                                |     |      |
| 25 | Use of sitter, kindergarten, or nursery school |     |      |
| 26 |                                                |     |      |
| 27 | Yes                                            | 197 | 20.2 |
| 28 |                                                |     |      |
| 29 | No                                             | 779 | 79.8 |
| 30 |                                                |     |      |
| 31 | Type of housing                                |     |      |
| 32 |                                                |     |      |
| 33 | House                                          | 516 | 52.9 |
| 34 |                                                |     |      |
| 35 | Apartment                                      | 460 | 47.1 |
| 36 |                                                |     |      |
| 37 | Annual income                                  |     |      |
| 38 |                                                |     |      |
| 39 | <3 million                                     | 117 | 12.0 |
| 40 |                                                |     |      |
| 41 | 3–5 million                                    | 366 | 37.5 |
| 42 |                                                |     |      |
| 43 | >5 million                                     | 493 | 50.5 |
| 44 |                                                |     |      |
| 45 | Unintentional injury                           |     |      |
| 46 |                                                |     |      |
| 47 | Yes                                            | 201 | 20.6 |
| 48 |                                                |     |      |
| 49 | No                                             | 775 | 79.4 |
| 50 |                                                |     |      |
| 51 |                                                |     |      |

Table 2 Distribution of 201 unintentionally injured children by injury-descriptive factors

| Factors                             | n=201 | %    |
|-------------------------------------|-------|------|
| Injury mechanism (multiple answers) |       |      |
| Fall                                | 117   | 58.2 |
| Burn                                | 47    | 23.4 |
| Poisoning/Aspiration                | 12    | 6.0  |
| Drowning                            | 6     | 3.0  |
| Traffic injury                      | 7     | 3.5  |
| Others                              | 12    | 6.0  |
| Gender of child                     |       |      |
| Male                                | 119   | 59.2 |
| Female                              | 82    | 40.8 |
| Time of injury                      |       |      |
| Daytime on a weekday                | 106   | 52.7 |
| Nighttime on a weekday              | 64    | 31.8 |
| Holiday                             | 31    | 15.4 |
| Place of injury                     |       |      |
| Home                                | 188   | 93.5 |
| Outdoor                             | 13    | 6.5  |
| Witnessed by caregivers             |       |      |
| Yes                                 | 129   | 64.2 |
| No                                  | 72    | 35.8 |
| Management after injury             |       |      |
| Visit hospital                      | 112   | 55.7 |

|                     |    |      |
|---------------------|----|------|
| Observation at home | 88 | 43.8 |
| Others              | 1  | 0.5  |

---

160

### 161 **Risk factors for unintentional injury among pre-school children in Japan**

162 Table 3 shows the incidence rates of 15 socioeconomic factors. The incidence  
 163 of unintentional injury was estimated at approximately 21% with or without the  
 164 presence of socioeconomic disadvantage. The risk for unintentional injuries was  
 165 higher among preschool children with high-school graduate fathers and those in  
 166 families with more siblings. However, there were no significant differences in  
 167 incident rates of unintentional injuries across all groups. Table 4 shows the  
 168 association between socioeconomic factors and timing of injury. Table 5 shows  
 169 the association between socioeconomic factors and management after injury.  
 170 Consistent with the main results, there was no relationship between  
 171 socioeconomic factors and the variables in these tables.

172 The results of the multivariate analysis are shown in Table 6. Between  
 173 households reporting unintentional injuries and those that did not report any, no  
 174 significant differences in terms of income of parents were observed in the incident  
 175 rates of unintentional injuries among preschool children (adjusted odds ratio, 0.90;  
 176 95% CI 0.53–1.53;  $p=0.701$ ). Similarly, there were no significant differences in the  
 177 other socioeconomic factors in terms of the incident rates of unintentional injuries  
 178 among preschool children.

179

Table 3 Unadjusted risk for unintentional injuries among children and socioeconomic factors

| Factors             | Overall<br>(n=976) | Unintentional injury |            |                |           |                                    |           |                   |           |                            |           |                  |           | p-value |                  |            |
|---------------------|--------------------|----------------------|------------|----------------|-----------|------------------------------------|-----------|-------------------|-----------|----------------------------|-----------|------------------|-----------|---------|------------------|------------|
|                     |                    | Fall<br>(n=117)      | %*<br>12.0 | Burn<br>(n=47) | %*<br>5.0 | Poisoning/<br>Aspiration<br>(n=12) | %*<br>1.3 | Drowning<br>(n=6) | %*<br>0.6 | Traffic<br>injury<br>(n=7) | %*<br>0.6 | Others<br>(n=12) | %*<br>1.3 |         | Total<br>(n=201) | %*<br>20.8 |
| Family type         |                    |                      |            |                |           |                                    |           |                   |           |                            |           |                  |           |         |                  | p=0.372    |
| Two parents         | 936                | 112                  | 12.0       | 47             | 5.0       | 12                                 | 1.3       | 6                 | 0.6       | 6                          | 0.6       | 12               | 1.3       | 195     | 20.8             |            |
| Single parent       | 40                 | 5                    | 12.5       | 0              | 0.0       | 0                                  | 0.0       | 0                 | 0.0       | 1                          | 2.5       | 0                | 0.0       | 6       | 15.0             |            |
| Age of mother       |                    |                      |            |                |           |                                    |           |                   |           |                            |           |                  |           |         |                  | p=0.635    |
| <29 years           | 109                | 15                   | 13.8       | 5              | 4.6       | 0                                  | 0.0       | 4                 | 3.7       | 0                          | 0.0       | 2                | 1.8       | 26      | 23.9             |            |
| 30–39 years         | 579                | 64                   | 11.1       | 28             | 4.8       | 8                                  | 1.4       | 2                 | 0.3       | 5                          | 0.9       | 8                | 1.4       | 115     | 19.9             |            |
| ≥40 years           | 288                | 38                   | 13.2       | 14             | 4.9       | 4                                  | 1.4       | 0                 | 0.0       | 2                          | 0.7       | 2                | 0.7       | 60      | 20.8             |            |
| Age of father       |                    |                      |            |                |           |                                    |           |                   |           |                            |           |                  |           |         |                  | p=0.940    |
| <29 years           | 68                 | 9                    | 13.2       | 3              | 4.4       | 0                                  | 0.0       | 1                 | 1.5       | 0                          | 0.0       | 1                | 1.5       | 14      | 20.6             |            |
| 30–39 years         | 462                | 55                   | 11.9       | 22             | 4.8       | 6                                  | 1.3       | 3                 | 0.6       | 2                          | 0.4       | 5                | 1.1       | 93      | 20.1             |            |
| ≥40 years           | 446                | 53                   | 11.9       | 22             | 4.9       | 6                                  | 1.3       | 2                 | 0.4       | 5                          | 1.1       | 6                | 1.3       | 94      | 21.1             |            |
| Education of mother |                    |                      |            |                |           |                                    |           |                   |           |                            |           |                  |           |         |                  | p=0.160    |

|                                             |     |    |      |    |     |   |     |   |     |   |     |    |     |     |      |         |
|---------------------------------------------|-----|----|------|----|-----|---|-----|---|-----|---|-----|----|-----|-----|------|---------|
| High school                                 | 277 | 33 | 11.9 | 15 | 5.4 | 2 | 0.7 | 2 | 0.7 | 2 | 0.7 | 4  | 1.4 | 58  | 20.9 |         |
| Business technical school or junior college | 351 | 48 | 13.7 | 22 | 6.3 | 3 | 0.9 | 1 | 0.3 | 4 | 1.1 | 4  | 1.1 | 82  | 23.4 |         |
| College                                     | 348 | 36 | 10.3 | 10 | 2.9 | 7 | 2.0 | 3 | 0.9 | 1 | 0.3 | 4  | 1.1 | 61  | 17.5 |         |
| Education of father                         |     |    |      |    |     |   |     |   |     |   |     |    |     |     |      | p=0.200 |
| High school                                 | 281 | 39 | 13.9 | 20 | 7.1 | 3 | 1.1 | 1 | 0.4 | 3 | 1.1 | 2  | 0.7 | 68  | 24.2 |         |
| Business technical school or junior college | 150 | 20 | 13.3 | 6  | 4.0 | 2 | 1.3 | 0 | 0.0 | 0 | 0.0 | 2  | 1.3 | 30  | 20.0 |         |
| College                                     | 545 | 58 | 10.6 | 21 | 3.9 | 7 | 1.3 | 5 | 0.9 | 4 | 0.7 | 8  | 1.5 | 103 | 18.9 |         |
| Number of children                          |     |    |      |    |     |   |     |   |     |   |     |    |     |     |      | p=0.138 |
| 1                                           | 375 | 44 | 11.7 | 11 | 2.9 | 3 | 0.8 | 2 | 0.5 | 1 | 0.3 | 4  | 1.1 | 65  | 17.3 |         |
| 2                                           | 447 | 53 | 11.9 | 26 | 5.8 | 7 | 1.6 | 4 | 0.9 | 4 | 0.9 | 7  | 1.6 | 101 | 22.6 |         |
| ≥3                                          | 154 | 20 | 13.0 | 10 | 6.5 | 2 | 1.3 | 0 | 0.0 | 2 | 1.3 | 1  | 0.6 | 35  | 22.7 |         |
| Infant (<1 year old)                        |     |    |      |    |     |   |     |   |     |   |     |    |     |     |      | p=0.403 |
| Yes                                         | 170 | 19 | 11.2 | 6  | 3.5 | 3 | 1.8 | 2 | 1.2 | 0 | 0.0 | 1  | 0.6 | 31  | 18.2 |         |
| No                                          | 806 | 98 | 12.2 | 41 | 5.1 | 9 | 1.1 | 4 | 0.5 | 7 | 0.9 | 11 | 1.4 | 170 | 21.1 |         |
| Older siblings (>6 years old)               |     |    |      |    |     |   |     |   |     |   |     |    |     |     |      | p=0.330 |
| Yes                                         | 374 | 47 | 12.6 | 22 | 5.9 | 5 | 1.3 | 1 | 0.3 | 4 | 1.1 | 4  | 1.1 | 83  | 22.2 |         |



|                                                   |     |     |      |    |     |    |     |   |     |   |     |    |     |     |      |  |         |
|---------------------------------------------------|-----|-----|------|----|-----|----|-----|---|-----|---|-----|----|-----|-----|------|--|---------|
| No                                                | 602 | 70  | 11.6 | 25 | 4.2 | 7  | 1.2 | 5 | 0.8 | 3 | 0.5 | 8  | 1.3 | 118 | 19.6 |  |         |
| Living with grandmother                           |     |     |      |    |     |    |     |   |     |   |     |    |     |     |      |  | p=0.933 |
| Yes                                               | 128 | 14  | 10.9 | 7  | 5.5 | 0  | 0.0 | 1 | 0.8 | 1 | 0.8 | 3  | 2.3 | 26  | 20.3 |  |         |
| No                                                | 848 | 103 | 12.1 | 40 | 4.7 | 12 | 1.4 | 5 | 0.6 | 6 | 0.7 | 9  | 1.1 | 175 | 20.6 |  |         |
| Living with grandfather                           |     |     |      |    |     |    |     |   |     |   |     |    |     |     |      |  | p=0.466 |
| Yes                                               | 362 | 47  | 13.0 | 19 | 5.2 | 4  | 1.1 | 2 | 0.6 | 1 | 0.3 | 6  | 1.7 | 79  | 21.8 |  |         |
| No                                                | 614 | 70  | 11.4 | 28 | 4.6 | 8  | 1.3 | 4 | 0.7 | 6 | 1.0 | 6  | 1.0 | 122 | 19.9 |  |         |
| Mother's employment status                        |     |     |      |    |     |    |     |   |     |   |     |    |     |     |      |  | p=0.574 |
| Employed                                          | 391 | 52  | 13.3 | 19 | 4.9 | 3  | 0.8 | 1 | 0.3 | 4 | 1.0 | 5  | 1.3 | 84  | 21.5 |  |         |
| Unemployed                                        | 585 | 65  | 11.1 | 28 | 4.8 | 9  | 1.5 | 5 | 0.9 | 3 | 0.5 | 7  | 1.2 | 117 | 20.0 |  |         |
| Father's employment status                        |     |     |      |    |     |    |     |   |     |   |     |    |     |     |      |  | p=0.463 |
| Employed                                          | 964 | 114 | 11.8 | 47 | 4.9 | 12 | 1.2 | 6 | 0.6 | 7 | 0.7 | 12 | 1.2 | 198 | 20.5 |  |         |
| Unemployed                                        | 12  | 3   | 25.0 | 0  | 0.0 | 0  | 0.0 | 0 | 0.0 | 0 | 0.0 | 0  | 0.0 | 3   | 25.0 |  |         |
| Use of sitter, kindergarten,<br>or nursery school |     |     |      |    |     |    |     |   |     |   |     |    |     |     |      |  | p=0.143 |
| Yes                                               | 197 | 32  | 16.2 | 9  | 4.6 | 2  | 1.0 | 0 | 0.0 | 2 | 1.0 | 3  | 1.5 | 48  | 24.4 |  |         |
| No                                                | 779 | 85  | 10.9 | 38 | 4.9 | 10 | 1.3 | 6 | 0.8 | 5 | 0.6 | 9  | 1.2 | 153 | 19.6 |  |         |
| Type of housing                                   |     |     |      |    |     |    |     |   |     |   |     |    |     |     |      |  | p=0.554 |
| House                                             | 516 | 66  | 12.8 | 28 | 5.4 | 2  | 0.4 | 2 | 0.4 | 4 | 0.8 | 8  | 1.6 | 110 | 21.3 |  |         |
| Apartment                                         | 460 | 51  | 11.1 | 19 | 4.1 | 10 | 2.2 | 4 | 0.9 | 3 | 0.7 | 4  | 0.9 | 91  | 19.8 |  |         |
| Annual income                                     |     |     |      |    |     |    |     |   |     |   |     |    |     |     |      |  | p=0.855 |
| <3 million                                        | 117 | 15  | 12.8 | 5  | 4.3 | 2  | 1.7 | 0 | 0.0 | 1 | 0.9 | 2  | 1.7 | 25  | 21.4 |  |         |

|             |     |    |      |    |     |   |     |   |     |   |     |   |     |    |      |
|-------------|-----|----|------|----|-----|---|-----|---|-----|---|-----|---|-----|----|------|
| 3–5 million | 366 | 48 | 13.1 | 17 | 4.6 | 2 | 0.5 | 4 | 1.1 | 2 | 0.5 | 5 | 1.4 | 78 | 21.3 |
| >5 million  | 493 | 54 | 11.0 | 25 | 5.1 | 8 | 1.6 | 2 | 0.4 | 4 | 0.8 | 5 | 1.0 | 98 | 19.9 |

180 \* The proportion of the number of unintentional injuries to the overall number of each socioeconomic factor

181 † The Pearson’s chi-squared test or Fisher’s exact test for total number of unintentional injuries

182

183

Table 4 Time of unintentional injuries among children and socioeconomic factors

| Factors       | Overall<br>(n=976) | Unintentional injury                  |      |                                        |     |                   |     |                  |      |
|---------------|--------------------|---------------------------------------|------|----------------------------------------|-----|-------------------|-----|------------------|------|
|               |                    | Daytime<br>on a<br>weekday<br>(n=106) |      | Nighttime<br>on a<br>weekday<br>(n=64) |     | Holiday<br>(n=31) |     | Total<br>(n=201) |      |
|               |                    |                                       | %*   |                                        | %*  |                   | %*  |                  | %*   |
| Family type   |                    |                                       |      |                                        |     |                   |     |                  |      |
| Two parents   | 936                | 102                                   | 10.9 | 62                                     | 6.6 | 31                | 3.3 | 195              | 20.8 |
| Single parent | 40                 | 4                                     | 10.0 | 2                                      | 5.0 | 0                 | 0.0 | 6                | 15.0 |
| Age of mother |                    |                                       |      |                                        |     |                   |     |                  |      |
| <29 years     | 109                | 14                                    | 12.8 | 8                                      | 7.3 | 4                 | 3.7 | 26               | 23.9 |
| 30–39 years   | 579                | 65                                    | 11.2 | 32                                     | 5.5 | 18                | 3.1 | 115              | 19.9 |

|                                                |     |    |      |    |     |    |     |     |      |
|------------------------------------------------|-----|----|------|----|-----|----|-----|-----|------|
| ≥40 years                                      | 288 | 27 | 9.4  | 24 | 8.3 | 9  | 3.1 | 60  | 20.8 |
| Age of father                                  |     |    |      |    |     |    |     |     |      |
| <29 years                                      | 68  | 9  | 13.2 | 4  | 5.9 | 1  | 1.5 | 14  | 20.6 |
| 30–39 years                                    | 462 | 52 | 11.3 | 26 | 5.6 | 15 | 3.2 | 93  | 20.1 |
| ≥40 years                                      | 446 | 45 | 10.1 | 34 | 7.6 | 15 | 3.4 | 94  | 21.1 |
| Education of mother                            |     |    |      |    |     |    |     |     |      |
| High school                                    | 277 | 29 | 10.5 | 20 | 7.2 | 9  | 3.2 | 58  | 20.9 |
| Business technical school<br>or junior college | 351 | 43 | 12.3 | 25 | 7.1 | 14 | 4.0 | 82  | 23.4 |
| College                                        | 348 | 34 | 9.8  | 19 | 5.5 | 8  | 2.3 | 61  | 17.5 |
| Education of father                            |     |    |      |    |     |    |     |     |      |
| High school                                    | 281 | 34 | 12.1 | 22 | 7.8 | 12 | 4.3 | 68  | 24.2 |
| Business technical school<br>or junior college | 150 | 19 | 12.7 | 8  | 5.3 | 3  | 2.0 | 30  | 20.0 |
| College                                        | 545 | 53 | 9.7  | 34 | 6.2 | 16 | 2.9 | 103 | 18.9 |
| Number of children                             |     |    |      |    |     |    |     |     |      |
| 1                                              | 375 | 37 | 9.9  | 19 | 5.1 | 9  | 2.4 | 65  | 17.3 |
| 2                                              | 447 | 50 | 11.2 | 34 | 7.6 | 17 | 3.8 | 101 | 22.6 |
| ≥3                                             | 154 | 19 | 12.3 | 11 | 7.1 | 5  | 3.2 | 35  | 22.7 |
| Infant (<1 year old)                           |     |    |      |    |     |    |     |     |      |
| Yes                                            | 170 | 23 | 13.5 | 7  | 4.1 | 1  | 0.6 | 31  | 18.2 |

|                                                |     |     |      |    |      |    |     |     |      |  |
|------------------------------------------------|-----|-----|------|----|------|----|-----|-----|------|--|
| No                                             | 806 | 83  | 10.3 | 57 | 7.1  | 30 | 3.7 | 170 | 21.1 |  |
| Older siblings (>6 years old)                  |     |     |      |    |      |    |     |     |      |  |
| Yes                                            | 374 | 43  | 11.5 | 24 | 6.4  | 16 | 4.3 | 83  | 22.2 |  |
| No                                             | 602 | 63  | 10.5 | 40 | 6.6  | 15 | 2.5 | 118 | 19.6 |  |
| Living with grandmother                        |     |     |      |    |      |    |     |     |      |  |
| Yes                                            | 128 | 13  | 10.2 | 7  | 5.5  | 6  | 4.7 | 26  | 20.3 |  |
| No                                             | 848 | 93  | 11.0 | 57 | 6.7  | 25 | 2.9 | 175 | 20.6 |  |
| Living with grandfather                        |     |     |      |    |      |    |     |     |      |  |
| Yes                                            | 362 | 44  | 12.2 | 26 | 7.2  | 9  | 2.5 | 79  | 21.8 |  |
| No                                             | 614 | 62  | 10.1 | 38 | 6.2  | 22 | 3.6 | 122 | 19.9 |  |
| Mother's employment status                     |     |     |      |    |      |    |     |     |      |  |
| Employed                                       | 391 | 35  | 9.0  | 33 | 8.4  | 16 | 4.1 | 84  | 21.5 |  |
| Unemployed                                     | 585 | 71  | 12.1 | 31 | 5.3  | 15 | 2.6 | 117 | 20.0 |  |
| Father's employment status                     |     |     |      |    |      |    |     |     |      |  |
| Employed                                       | 964 | 104 | 10.8 | 63 | 6.5  | 31 | 3.2 | 198 | 20.5 |  |
| Unemployed                                     | 12  | 2   | 16.7 | 1  | 8.3  | 0  | 0.0 | 3   | 25.0 |  |
| Use of sitter, kindergarten, or nursery school |     |     |      |    |      |    |     |     |      |  |
| Yes                                            | 197 | 16  | 8.1  | 21 | 10.7 | 11 | 5.6 | 48  | 24.4 |  |
| No                                             | 779 | 90  | 11.6 | 43 | 5.5  | 20 | 2.6 | 153 | 19.6 |  |
| Type of housing                                |     |     |      |    |      |    |     |     |      |  |
| House                                          | 516 | 59  | 11.4 | 34 | 6.6  | 17 | 3.3 | 110 | 21.3 |  |

|               |     |    |      |    |     |    |     |    |      |
|---------------|-----|----|------|----|-----|----|-----|----|------|
| Apartment     | 460 | 47 | 10.2 | 30 | 6.5 | 14 | 3.0 | 91 | 19.8 |
| Annual income |     |    |      |    |     |    |     |    |      |
| <3 million    | 117 | 15 | 12.8 | 9  | 7.7 | 1  | 0.9 | 25 | 21.4 |
| 3–5 million   | 366 | 42 | 11.5 | 23 | 6.3 | 13 | 3.6 | 78 | 21.3 |
| >5 million    | 493 | 49 | 9.9  | 32 | 6.5 | 17 | 3.4 | 98 | 19.9 |

184 \*The proportion of the number of unintentional injuries to the overall number of each socioeconomic factor

185

Table 5 Management after unintentional injuries among children and socioeconomic factors

| Factors       | Overall (n=976)           |     | Unintentional injury          |    |                 |    |                  |     |      |
|---------------|---------------------------|-----|-------------------------------|----|-----------------|----|------------------|-----|------|
|               | Visit hospital<br>(n=112) | %*  | Observation at home<br>(n=88) | %* | Others<br>(n=1) | %* | Total<br>(n=201) | %*  |      |
| Family type   |                           |     |                               |    |                 |    |                  |     |      |
| Two parents   | 936                       | 109 | 11.6                          | 85 | 9.1             | 1  | 0.1              | 195 | 20.8 |
| Single parent | 40                        | 3   | 7.5                           | 3  | 7.5             | 0  | 0.0              | 6   | 15.0 |
| Age of mother |                           |     |                               |    |                 |    |                  |     |      |
| <29 years     | 109                       | 8   | 7.3                           | 18 | 16.5            | 0  | 0.0              | 26  | 23.9 |
| 30–39 years   | 579                       | 63  | 10.9                          | 52 | 9.0             | 0  | 0.0              | 115 | 19.9 |
| ≥40 years     | 288                       | 41  | 14.2                          | 18 | 6.3             | 1  | 0.3              | 60  | 20.8 |

|                                             |     |    |      |    |      |   |     |     |      |
|---------------------------------------------|-----|----|------|----|------|---|-----|-----|------|
| Age of father                               |     |    |      |    |      |   |     |     |      |
| <29 years                                   | 68  | 5  | 7.4  | 9  | 13.2 | 0 | 0.0 | 14  | 20.6 |
| 30–39 years                                 | 462 | 51 | 11.0 | 42 | 9.1  | 0 | 0.0 | 93  | 20.1 |
| ≥40 years                                   | 446 | 56 | 12.6 | 37 | 8.3  | 1 | 0.2 | 94  | 21.1 |
| Education of mother                         |     |    |      |    |      |   |     |     |      |
| High school                                 | 277 | 27 | 9.7  | 30 | 10.8 | 0 | 0.0 | 58  | 20.9 |
| Business technical school or junior college | 351 | 53 | 15.1 | 29 | 8.3  | 0 | 0.0 | 82  | 23.4 |
| College                                     | 348 | 32 | 9.2  | 29 | 8.3  | 1 | 0.3 | 61  | 17.5 |
| Education of father                         |     |    |      |    |      |   |     |     |      |
| High school                                 | 281 | 39 | 13.9 | 28 | 10.0 | 1 | 0.4 | 68  | 24.2 |
| Business technical school or junior college | 150 | 19 | 12.7 | 11 | 7.3  | 0 | 0.0 | 30  | 20.0 |
| College                                     | 545 | 54 | 9.9  | 49 | 9.0  | 0 | 0.0 | 103 | 18.9 |
| Number of children                          |     |    |      |    |      |   |     |     |      |
| 1                                           | 375 | 26 | 6.9  | 38 | 10.1 | 1 | 0.3 | 65  | 17.3 |
| 2                                           | 447 | 61 | 13.6 | 40 | 8.9  | 0 | 0.0 | 101 | 22.6 |
| ≥3                                          | 154 | 25 | 16.2 | 10 | 6.5  | 0 | 0.0 | 35  | 22.7 |

|    |                                                |     |     |      |    |      |   |     |     |      |
|----|------------------------------------------------|-----|-----|------|----|------|---|-----|-----|------|
| 1  |                                                |     |     |      |    |      |   |     |     |      |
| 2  |                                                |     |     |      |    |      |   |     |     |      |
| 3  |                                                |     |     |      |    |      |   |     |     |      |
| 4  |                                                |     |     |      |    |      |   |     |     |      |
| 5  |                                                |     |     |      |    |      |   |     |     |      |
| 6  |                                                |     |     |      |    |      |   |     |     |      |
| 7  |                                                |     |     |      |    |      |   |     |     |      |
| 8  | Infant (<1 year old)                           |     |     |      |    |      |   |     |     |      |
| 9  | Yes                                            | 170 | 13  | 7.6  | 18 | 10.6 | 0 | 0.0 | 31  | 18.2 |
| 10 | No                                             | 806 | 99  | 12.3 | 70 | 8.7  | 1 | 0.1 | 170 | 21.1 |
| 11 |                                                |     |     |      |    |      |   |     |     |      |
| 12 | Older siblings (>6 years old)                  |     |     |      |    |      |   |     |     |      |
| 13 | Yes                                            | 374 | 55  | 14.7 | 28 | 7.5  | 0 | 0.0 | 83  | 22.2 |
| 14 | No                                             | 602 | 57  | 9.5  | 60 | 10.0 | 1 | 0.2 | 118 | 19.6 |
| 15 |                                                |     |     |      |    |      |   |     |     |      |
| 16 | Living with grandmother                        |     |     |      |    |      |   |     |     |      |
| 17 | Yes                                            | 128 | 13  | 10.2 | 13 | 10.2 | 0 | 0.0 | 26  | 20.3 |
| 18 | No                                             | 848 | 99  | 11.7 | 75 | 8.8  | 1 | 0.1 | 175 | 20.6 |
| 19 |                                                |     |     |      |    |      |   |     |     |      |
| 20 | Living with grandfather                        |     |     |      |    |      |   |     |     |      |
| 21 | Yes                                            | 362 | 44  | 12.2 | 35 | 9.7  | 0 | 0.0 | 79  | 21.8 |
| 22 | No                                             | 614 | 68  | 11.1 | 53 | 8.6  | 1 | 0.2 | 122 | 19.9 |
| 23 |                                                |     |     |      |    |      |   |     |     |      |
| 24 | Mother's employment status                     |     |     |      |    |      |   |     |     |      |
| 25 | Employed                                       | 391 | 53  | 13.6 | 31 | 7.9  | 0 | 0.0 | 84  | 21.5 |
| 26 | Unemployed                                     | 585 | 59  | 10.1 | 57 | 9.7  | 1 | 0.2 | 117 | 20.0 |
| 27 |                                                |     |     |      |    |      |   |     |     |      |
| 28 | Father's employment status                     |     |     |      |    |      |   |     |     |      |
| 29 | Employed                                       | 964 | 110 | 11.4 | 87 | 9.0  | 1 | 0.1 | 198 | 20.5 |
| 30 | Unemployed                                     | 12  | 2   | 16.7 | 1  | 8.3  | 0 | 0.0 | 3   | 25.0 |
| 31 |                                                |     |     |      |    |      |   |     |     |      |
| 32 | Use of sitter, kindergarten, or nursery school |     |     |      |    |      |   |     |     |      |
| 33 | Yes                                            | 197 | 32  | 16.2 | 16 | 8.1  | 0 | 0.0 | 48  | 24.4 |
| 34 | No                                             | 779 | 80  | 10.3 | 72 | 9.2  | 1 | 0.1 | 153 | 19.6 |
| 35 |                                                |     |     |      |    |      |   |     |     |      |
| 36 |                                                |     |     |      |    |      |   |     |     |      |
| 37 |                                                |     |     |      |    |      |   |     |     |      |
| 38 |                                                |     |     |      |    |      |   |     |     |      |
| 39 |                                                |     |     |      |    |      |   |     |     |      |
| 40 |                                                |     |     |      |    |      |   |     |     |      |
| 41 |                                                |     |     |      |    |      |   |     |     |      |
| 42 |                                                |     |     |      |    |      |   |     |     |      |
| 43 |                                                |     |     |      |    |      |   |     |     |      |
| 44 |                                                |     |     |      |    |      |   |     |     |      |
| 45 |                                                |     |     |      |    |      |   |     |     |      |
| 46 |                                                |     |     |      |    |      |   |     |     |      |
| 47 |                                                |     |     |      |    |      |   |     |     |      |

1  
2  
3  
4  
5  
6  
7  
8  
9  
10  
11  
12  
13  
14  
15  
16  
17  
18  
19  
20  
21  
22  
23  
24  
25  
26  
27  
28  
29  
30  
31  
32  
33  
34  
35  
36  
37  
38  
39  
40  
41  
42  
43  
44  
45  
46  
47

| Type of housing |     |    |      |    |      |   |     |     |      |
|-----------------|-----|----|------|----|------|---|-----|-----|------|
| House           | 516 | 73 | 14.1 | 37 | 7.2  | 0 | 0.0 | 110 | 21.3 |
| Apartment       | 460 | 39 | 8.5  | 51 | 11.1 | 1 | 0.2 | 91  | 19.8 |
| Annual income   |     |    |      |    |      |   |     |     |      |
| <3 million      | 117 | 14 | 12.0 | 11 | 9.4  | 0 | 0.0 | 25  | 21.4 |
| 3–5 million     | 366 | 36 | 9.8  | 41 | 11.2 | 1 | 0.3 | 78  | 21.3 |
| >5 million      | 493 | 62 | 12.6 | 36 | 7.3  | 0 | 0.0 | 98  | 19.9 |

186 \*The proportion of the number of unintentional injuries to the overall number of each socioeconomic facto



Table 6. Logistic regression models of socioeconomic indicators and unintentional injuries

| Factors                                     | Odds ratio | 95% CI      | p-value |
|---------------------------------------------|------------|-------------|---------|
| Family type                                 | 0.60       | (0.23–1.53) | 0.283   |
| Age of mother                               |            |             | 0.433   |
| <29 years                                   | 1          | (reference) |         |
| 30–39 years                                 | 0.68       | (0.37–1.22) | 0.196   |
| ≥40 years                                   | 0.69       | (0.34–1.37) | 0.285   |
| Age of father                               |            |             | 0.849   |
| <29 years                                   | 1          | (reference) |         |
| 30–39 years                                 | 1.23       | (0.58–2.61) | 0.596   |
| ≥40 years                                   | 1.27       | (0.56–2.85) | 0.570   |
| Education of mother                         |            |             | 0.284   |
| High school                                 | 1          | (reference) |         |
| Business technical school or junior college | 1.20       | (0.82–1.82) | 0.334   |
| College                                     | 0.90       | (0.57–1.40) | 0.629   |
| Education of father                         |            |             | 0.504   |
| High school                                 | 1          | (reference) |         |
| Business technical school or junior college | 0.78       | (0.47–1.29) | 0.339   |
| College                                     | 0.81       | (0.54–1.21) | 0.299   |
| Number of children                          |            |             | 0.168   |
| 1                                           | 1          | (reference) |         |
| 2                                           | 1.51       | (0.98–2.31) | 0.059   |
| ≥3                                          | 1.49       | (0.79–2.79) | 0.215   |

|    |                                                |      |             |       |
|----|------------------------------------------------|------|-------------|-------|
| 1  |                                                |      |             |       |
| 2  |                                                |      |             |       |
| 3  |                                                |      |             |       |
| 4  |                                                |      |             |       |
| 5  | Infant (<1 year old)                           | 0.78 | (0.49–1.23) | 0.278 |
| 6  |                                                |      |             |       |
| 7  | Older siblings (>6 years old)                  | 0.91 | (0.58–1.43) | 0.682 |
| 8  |                                                |      |             |       |
| 9  | Living with grandmother                        | 0.87 | (0.52–1.47) | 0.606 |
| 10 |                                                |      |             |       |
| 11 | Living with grandfather                        | 1.17 | (0.83–1.65) | 0.383 |
| 12 |                                                |      |             |       |
| 13 | Mother's employment status                     | 0.99 | (0.67–1.47) | 0.976 |
| 14 |                                                |      |             |       |
| 15 | Father's employment status                     | 0.79 | (0.20–3.12) | 0.737 |
| 16 |                                                |      |             |       |
| 17 | Use of sitter, kindergarten, or nursery school | 1.38 | (0.88–2.16) | 0.165 |
| 18 |                                                |      |             |       |
| 19 | Type of housing                                | 0.97 | (0.69–1.36) | 0.836 |
| 20 |                                                |      |             |       |
| 21 | Annual income (Yen)                            |      |             | 0.849 |
| 22 |                                                |      |             |       |
| 23 | <3 million                                     | 1    | (reference) |       |
| 24 |                                                |      |             |       |
| 25 | 3–5 million                                    | 0.99 | (0.58–1.69) | 0.977 |
| 26 |                                                |      |             |       |
| 27 | >5 million                                     | 0.90 | (0.53–1.53) | 0.701 |

187 CI, confidence interval

## 188 DISCUSSION

189 Herein, we observed that unintentional injuries among preschool children  
 190 under 6 years old occurred at approximately constant rates and were unrelated to  
 191 any socioeconomic factors in Japan. Socioeconomic disadvantages did not  
 192 significantly increase the risk for unintentional injuries among preschool children.

193 Our data showed that households whose annual income was under 3  
 194 million yen accounted for 12.0% of the population, whereas the relative poverty  
 195 rate for households with children was 12.9% in Japan.<sup>17</sup> The incidence rate of  
 196 unintentional injuries observed in our study is not very different from that reported  
 197 in other studies: 29.0 injuries per 100 children over a period of 1 year within a  
 198 population of 0–4-year-old children in a Greek town and 17.4 medically treated  
 199 injuries within a population of 0–4-year-old children and adolescents in a health  
 200 maintenance organization.<sup>8 19</sup>

1  
2  
3  
4  
5 201 Nevertheless, our results differ from the outcomes reported in other  
6  
7 202 studies of the relationship between unintentional injuries and socioeconomic  
8  
9 203 factors.<sup>7 10 12</sup> There are several explanations for these results. First, the younger  
10  
11 204 age of children may affect the relationship between the risk for unintentional  
12  
13 205 injuries and socioeconomic factors. A previous study showed very minor  
14  
15 206 socioeconomic differences in the injury risk among 0–4-year-old children in  
16  
17 207 Sweden.<sup>20</sup> However, socioeconomic differences were observed for traffic injury  
18  
19 208 risk from the age of 5 years onwards.<sup>20</sup> Another study reported that the relative  
20  
21 209 risk of being injured in a road traffic incident is higher for 5–19-year-olds with low  
22  
23 210 socioeconomic status than for those with higher socioeconomic status.<sup>21</sup>  
24  
25 211 Alternatively, caregiver supervision might modify the association between  
26  
27 212 unintentional injury and socioeconomic factors in younger ages, because the  
28  
29 213 proportion of injuries witnessed by caregivers was high in our study. A previous  
30  
31 214 study suggested lack of supervision made children under 5 years at risk of high  
32  
33 215 mortality by unintentional injuries.<sup>22</sup> Therefore, the age of the children, which was  
34  
35 216 under 6 years old in our study, might help to decrease the risk of unintentional  
36  
37 217 injuries in lower socioeconomic status families. Second, the following  
38  
39 218 characteristics specific to Japan might reduce the socioeconomic differences:  
40  
41 219 relatively low exposure to environmental hazards, the social support network, and  
42  
43 220 ethnic homogeneity.<sup>23</sup> The absolute number of traffic accidents in Japan has  
44  
45 221 gradually decreased from 887000 in 2006 to 499000 in 2016, owing to new road  
46  
47 222 traffic laws and improvements in the quality of roads, vehicle engineering, and  
48  
49 223 driver behavior.<sup>24 25</sup> The Japanese government provides households with children  
50  
51 224 allowances according to income, employment or financial support for single parent  
52  
53 225 families, and visits for all families with infants.<sup>26</sup> All municipalities in Japan conduct  
54  
55 226 health checkups at healthcare centers for children aged 18–23 months and  
56  
57  
58  
59  
60

1  
2  
3  
4  
5 227 children aged 36–47 months, despite socioeconomic differences. The mean  
6  
7 228 response rate for these health checkups is over 90%.<sup>27</sup>

8  
9 229 Taken together, our data and those from previous studies, confirm that  
10  
11 230 the relationship between unintentional injury and socioeconomic factors differs for  
12  
13 231 each nation.<sup>6-8 10 11 13 28 29</sup> It is difficult to generalize the influence of  
14  
15 232 socioeconomic factors on the risk of unintentional childhood injuries. Therefore,  
16  
17 233 prevention strategies should vary from country to country. In Japan, prevention  
18  
19 234 strategies that focus on socioeconomic disadvantages would be inadequate. A  
20  
21 235 comprehensive approach that involves health checkups could be a useful method  
22  
23 236 for prevention of unintentional injuries.

24  
25 237

### 26 27 238 **Limitations**

28  
29 239 This study had several limitations. First, only those households that had  
30  
31 240 access to the internet were included. However, we selected households with a  
32  
33 241 population distribution similar to that in the national census. We had a high  
34  
35 242 internet penetration rate of the general population (83.5%) in Japan.<sup>30</sup> In addition,  
36  
37 243 there were no differences between the relative poverty rates recorded in our study  
38  
39 244 and those for the whole nation. Second, the outcome measures were based on  
40  
41 245 self-reporting. The respondents may have been unaware of incidences of  
42  
43 246 unintentional injury, or recalled the accident inaccurately. Thus, the incidence of  
44  
45 247 unintentional injury might be underestimated. However, the incident rates  
46  
47 248 recorded in our study are not very different from those obtained in other studies.  
48  
49 249 Third, although we excluded households which had missing information regarding  
50  
51 250 parent education and type of housing, this might have resulted in bias due to  
52  
53 251 missing data. However, we excluded only 24 households. Additionally, the risk of  
54  
55 252 unintentional injury was similar, despite of the high proportion of single parents in

1  
2  
3  
4  
5 253 the missing data. Thus, it might not impact the validity of the conclusion. Finally,  
6  
7 254 our inferences might be confounded by unmeasured factors, such as gender,  
8  
9 255 mental health conditions, and physical disability of the children. Future studies  
10  
11 256 should measure the non-socioeconomic factors relating to unintentional injuries  
12  
13 257 among children more explicitly.  
14

15 258

## 16 259 **Conclusion**

17  
18 260 Unintentional injuries among preschool children occurred at approximately  
19  
20 261 constant rates irrespective of the presence of socioeconomic factors. The  
21  
22 262 association between socioeconomic factors and unintentional injury varies across  
23  
24 263 different countries. Prevention strategies aimed at unintentional injuries that take  
25  
26 264 socioeconomic disadvantages into consideration may not be applicable in Japan.  
27

28  
29 265  
30  
31  
32  
33  
34  
35  
36  
37  
38  
39  
40  
41  
42  
43  
44  
45  
46  
47  
48  
49  
50  
51  
52  
53  
54  
55  
56  
57  
58  
59  
60

1  
2  
3  
4  
5 266 **CONTRIBUTORSHIP STATEMENT**

6  
7 267 NS conceived the study. YH, JI and KA supervised the conduct of the trial  
8  
9 268 and data collection. NS managed the data, including quality control. KA provided  
10  
11 269 statistical advice on the study design and analyzed the data; NS chaired the data  
12  
13 270 oversight committee. NS, YH, and KA drafted the manuscript, and all authors  
14  
15 271 contributed substantially to its revision. NS takes responsibility for the paper as a  
16  
17 272 whole. All authors read and approved the final manuscript.  
18

19 273

20  
21 274 **COMPETING INTERESTS**

22  
23 275 None declared.  
24

25 276

26  
27 277 **FUNDING**

28  
29 278 This research received no specific grant from any funding agency in the  
30  
31 279 public, commercial or not-for-profit sectors.  
32

33 280

34  
35 281 **DATA SHARING STATEMENT**

36  
37 282 The database set was available for all authors of the study, and will be available  
38  
39 283 for other non-commercial researchers on request.  
40

41 284  
42  
43  
44  
45  
46  
47  
48  
49  
50  
51  
52  
53  
54  
55  
56  
57  
58  
59  
60

285

286 **References**

- 287 1. Alonge O, Khan UR, Hyder AA. Our Shrinking Globe: Implications for Child  
288 Unintentional Injuries. *Pediatr Clin North Am* 2016;63:167–81.
- 289 2. Alonge O, Hyder AA. Reducing the global burden of childhood  
290 unintentional injuries. *Arch Dis Child* 2014;99:62–9.
- 291 3. Hyder AA, Wali S, Fishman S, et al. The burden of unintentional injuries  
292 among the under-five population in South Asia. *Acta Paediatr*  
293 2008;97:267–75.
- 294 4. Krug EG, Sharma GK, Lozano R. The global burden of injuries. *Am J*  
295 *Public Health* 2000;90:523–6.
- 296 5. Peden M, Oyegbite K, Ozanne-Smith J, et al. *World Report on Child Injury*  
297 *Prevention*. Geneva: World Health Organization, 2008.
- 298 6. Nathens AB, Neff MJ, Goss CH, et al. Effect of an older sibling and birth  
299 interval on the risk of childhood injury. *Inj Prev* 2000;6:219–22.
- 300 7. Hjern A, Ringback-Weitof G, Andersson R. Socio-demographic risk factors  
301 for home-type injuries in Swedish infants and toddlers. *Acta Paediatr*  
302 2001;90:61–8.
- 303 8. Petridou E, Anastasiou A, Katsiardanis K, et al. A prospective  
304 population-based study of childhood injuries: the Velestino town study. *Eur*  
305 *J Public Health* 2005;15:9–14.
- 306 9. Weitof GR, Hjern A, Haglund B, et al. Mortality, severe morbidity, and  
307 injury in children living with single parents in Sweden: a population-based  
308 study. *Lancet* 2003;361:289–95.
- 309 10. Laursen B, Nielsen JW. Influence of sociodemographic factors on the risk  
310 of unintentional childhood home injuries. *Eur J Public Health*

- 1  
2  
3  
4  
5 311 2008;18:366–70.  
6  
7 312 11. Faelker T, Pickett W, Brison RJ. Socioeconomic differences in childhood  
8  
9 313 injury: a population-based epidemiologic study in Ontario, Canada. *Inj*  
10  
11 314 *Prev* 2000;6:203–8.  
12  
13 315 12. Laflamme L, Diderichsen F. Social differences in traffic injury risks in  
14  
15 316 childhood and youth--a literature review and a research agenda. *Inj Prev*  
16  
17 317 2000;6:293–8.  
18  
19 318 13. de Lourdes Drachler M, de Carvalho Leite JC, Marshall T, et al. Effects of  
20  
21 319 the home environment on unintentional domestic injuries and related  
22  
23 320 health care attendance in infants. *Acta Paediatr* 2007;96:1169–73.  
24  
25 321 14. Sekii H, Ohtsu T, Shirasawa T, et al. Childhood mortality due to  
26  
27 322 unintentional injuries in Japan, 2000–2009. *Int J Environ Res Public Health*  
28  
29 323 2013;10:528–40.  
30  
31 324 15. Director-General for statistics and information policy, Ministry of Health,  
32  
33 325 Labour and Welfare. Vital statistics in Japan. Trends up to 2015.  
34  
35 326 <http://www.mhlw.go.jp/english/database/db-hw/dl/81-1a2en.pdf> (accessed  
36  
37 327 20 Nov 2017).  
38  
39 328 16. OECD Rights and Translation Unit. Growing Unequal? Income Distribution  
40  
41 329 and Poverty in OECD Countries. Paris: OECD publications 2008.  
42  
43 330 17. Ministry of Health, Labour and Welfare. Comprehensive Survey of Living  
44  
45 331 Conditions of the People on Health and Welfare. Tokyo: Ministry of Health,  
46  
47 332 Labour and Welfare 2016.  
48  
49 333 18. Fujiwara T, Yamaoka Y, Morisaki N. Self-Reported Prevalence and Risk  
50  
51 334 Factors for Shaking and Smothering Among Mothers of 4-Month-Old  
52  
53 335 Infants in Japan. *J Epidemiol* 2016;26:4-13.  
54  
55 336 19. Rivara FP, Calonge N, Thompson RS. Population-based study of  
56  
57  
58  
59  
60



- 1  
2  
3  
4  
5 337 unintentional injury incidence and impact during childhood. *Am J Public*  
6  
7 338 *Health* 1989;79:990–4.
- 8  
9 339 20. Engstrom K, Diderichsen F, Laflamme L. Socioeconomic differences in  
10  
11 340 injury risks in childhood and adolescence: a nation-wide study of  
12  
13 341 intentional and unintentional injuries in Sweden. *Inj Prev* 2002;8:137–42.
- 14  
15 342 21. Laflamme L, Engstrom K. Socioeconomic differences in Swedish  
16  
17 343 children and adolescents injured in road traffic incidents: cross sectional  
18  
19 344 study. *BMJ* 2002;324:396–7.
- 20  
21 345 22. Khatlani K, Alonge O, Rahman A, et al. Caregiver Supervision Practices  
22  
23 346 and Risk of Childhood Unintentional Injury Mortality in Bangladesh. *Int J*  
24  
25 347 *Environ Res Public Health* 2017;14(5).
- 26  
27 348 23. Kagamimori S, Gaina A, Naser Moaddeli A. Socioeconomic status and  
28  
29 349 health in the Japanese population. *Soc Sci Med* 2009;68:2152–60.
- 30  
31 350 24. Nagata T, Setoguchi S, Hemenway D, et al. Effectiveness of a law to  
32  
33 351 reduce alcohol-impaired driving in Japan. *Inj Prev* 2008;14:19–23.
- 34  
35 352 25. National Police Agency. Trends in traffic accidents by year. Tokyo: Traffic  
36  
37 353 accidents situation 2016.
- 38  
39 354 26. Ministry of Health, Labour and Welfare. Equal Employment and Child  
40  
41 355 Welfare. Tokyo: Ministry of Health, Labour and Welfare 2015.
- 42  
43 356 27. Yamamoto N, Honda C, Nagata S. Current trends and age-based  
44  
45 357 differences of unintentional injury in Japanese children. *Biosci Trends*  
46  
47 358 2016;10:152–7.
- 48  
49 359 28. Chowdhury AH, Hanifi SMA, Mia MN, et al. Socioeconomic inequalities in  
50  
51  
52 360 under-five mortality in rural Bangladesh: evidence from seven national  
53  
54  
55 361 surveys spreading over 20 years. *Int J Equity Health* 2017;16(1):197.

- 1  
2  
3  
4  
5 362 29. Fang X, Jing R, Zeng G, et al. Socioeconomic status and the incidence of  
6  
7 363 child injuries in China. *Soc Sci Med* 2014;102:33-40.  
8  
9 364 30. Ministry of Internal Affairs and Communications. Information and  
10  
11 365 Communications in Japan 2017. Tokyo: Ministry of Internal Affairs and  
12  
13 366 Communications 2017.  
14  
15 367

For peer review only

1  
2  
3  
4  
5  
6  
7  
8  
9  
10  
11  
12  
13  
14  
15  
16  
17  
18  
19  
20  
21  
22  
23  
24  
25  
26  
27  
28  
29  
30  
31  
32  
33  
34  
35  
36  
37  
38  
39  
40  
41  
42  
43  
44  
45  
46  
47  
48  
49  
50  
51  
52  
53  
54  
55  
56  
57  
58  
59  
60

## STROBE Statement—checklist of items that should be included in reports of observational studies

|                              | Item No | Recommendation                                                                                                                                                                             | Reported on page # |
|------------------------------|---------|--------------------------------------------------------------------------------------------------------------------------------------------------------------------------------------------|--------------------|
| <b>Title and abstract</b>    | 1       | (a) Indicate the study's design with a commonly used term in the title or the abstract                                                                                                     | P1,2               |
|                              |         | (b) Provide in the abstract an informative and balanced summary of what was done and what was found                                                                                        | p2                 |
| <b>Introduction</b>          |         |                                                                                                                                                                                            |                    |
| Background/rationale         | 2       | Explain the scientific background and rationale for the investigation being reported                                                                                                       | P4                 |
| Objectives                   | 3       | State specific objectives, including any prespecified hypotheses                                                                                                                           | P4,5               |
| <b>Methods</b>               |         |                                                                                                                                                                                            |                    |
| Study design                 | 4       | Present key elements of study design early in the paper                                                                                                                                    | P5                 |
| Setting                      | 5       | Describe the setting, locations, and relevant dates, including periods of recruitment, exposure, follow-up, and data collection                                                            | P5                 |
| Participants                 | 6       | (a) <i>Cohort study</i> —Give the eligibility criteria, and the sources and methods of selection of participants. Describe methods of follow-up                                            | P5                 |
|                              |         | <i>Case-control study</i> —Give the eligibility criteria, and the sources and methods of case ascertainment and control selection. Give the rationale for the choice of cases and controls |                    |
|                              |         | <i>Cross-sectional study</i> —Give the eligibility criteria, and the sources and methods of selection of participants                                                                      |                    |
|                              |         | (b) <i>Cohort study</i> —For matched studies, give matching criteria and number of exposed and unexposed                                                                                   |                    |
|                              |         | <i>Case-control study</i> —For matched studies, give matching criteria and the number of controls per case                                                                                 |                    |
| Variables                    | 7       | Clearly define all outcomes, exposures, predictors, potential confounders, and effect modifiers. Give diagnostic criteria, if applicable                                                   | P5, 6              |
| Data sources/<br>measurement | 8*      | For each variable of interest, give sources of data and details of methods of assessment (measurement). Describe comparability of assessment methods if there is more than one group       | P5,6               |
| Bias                         | 9       | Describe any efforts to address potential sources of bias                                                                                                                                  | P5,6               |
| Study size                   | 10      | Explain how the study size was arrived at                                                                                                                                                  | P6                 |
| Quantitative variables       | 11      | Explain how quantitative variables were handled in the analyses. If applicable, describe which groupings were chosen and why                                                               | P6                 |
| Statistical methods          | 12      | (a) Describe all statistical methods, including those used to control for confounding                                                                                                      | P6,7               |
|                              |         | (b) Describe any methods used to examine subgroups and interactions                                                                                                                        | P6,7               |
|                              |         | (c) Explain how missing data were addressed                                                                                                                                                | P5                 |
|                              |         | (d) <i>Cohort study</i> —If applicable, explain how loss to follow-up was addressed                                                                                                        | P5                 |
|                              |         | <i>Case-control study</i> —If applicable, explain how matching of cases and controls was addressed                                                                                         |                    |
|                              |         | <i>Cross-sectional study</i> —If applicable, describe analytical methods taking account of sampling strategy                                                                               |                    |

(e) Describe any sensitivity analyses

| <b>Results</b>           |     |                                                                                                                                                                                                              |           |
|--------------------------|-----|--------------------------------------------------------------------------------------------------------------------------------------------------------------------------------------------------------------|-----------|
| Participants             | 13* | (a) Report numbers of individuals at each stage of study—eg numbers potentially eligible, examined for eligibility, confirmed eligible, included in the study, completing follow-up, and analysed            | P8        |
|                          |     | (b) Give reasons for non-participation at each stage                                                                                                                                                         | P8        |
|                          |     | (c) Consider use of a flow diagram                                                                                                                                                                           |           |
| Descriptive data         | 14* | (a) Give characteristics of study participants (eg demographic, clinical, social) and information on exposures and potential confounders                                                                     | P8        |
|                          |     | (b) Indicate number of participants with missing data for each variable of interest                                                                                                                          | P8        |
|                          |     | (c) <i>Cohort study</i> —Summarise follow-up time (eg, average and total amount)                                                                                                                             |           |
| Outcome data             | 15* | <i>Cohort study</i> —Report numbers of outcome events or summary measures over time                                                                                                                          |           |
|                          |     | <i>Case-control study</i> —Report numbers in each exposure category, or summary measures of exposure                                                                                                         |           |
|                          |     | <i>Cross-sectional study</i> —Report numbers of outcome events or summary measures                                                                                                                           | P8        |
| Main results             | 16  | (a) Give unadjusted estimates and, if applicable, confounder-adjusted estimates and their precision (eg, 95% confidence interval). Make clear which confounders were adjusted for and why they were included | P11       |
|                          |     | (b) Report category boundaries when continuous variables were categorized                                                                                                                                    |           |
|                          |     | (c) If relevant, consider translating estimates of relative risk into absolute risk for a meaningful time period                                                                                             |           |
| Other analyses           | 17  | Report other analyses done—eg analyses of subgroups and interactions, and sensitivity analyses                                                                                                               | P12-21    |
| <b>Discussion</b>        |     |                                                                                                                                                                                                              |           |
| Key results              | 18  | Summarise key results with reference to study objectives                                                                                                                                                     | P23       |
| Limitations              | 19  | Discuss limitations of the study, taking into account sources of potential bias or imprecision. Discuss both direction and magnitude of any potential bias                                                   | P25,26    |
| Interpretation           | 20  | Give a cautious overall interpretation of results considering objectives, limitations, multiplicity of analyses, results from similar studies, and other relevant evidence                                   | P23,24,25 |
| Generalisability         | 21  | Discuss the generalisability (external validity) of the study results                                                                                                                                        | P24       |
| <b>Other information</b> |     |                                                                                                                                                                                                              |           |
| Funding                  | 22  | Give the source of funding and the role of the funders for the present study and, if applicable, for the original study on which the present article is based                                                | P27       |

\*Give information separately for cases and controls in case-control studies and, if applicable, for exposed and unexposed groups in cohort and cross-sectional studies.

1  
2  
3  
4 **Note:** An Explanation and Elaboration article discusses each checklist item and gives methodological background and published examples of transparent reporting. The STROBE  
5 checklist is best used in conjunction with this article (freely available on the Web sites of PLoS Medicine at <http://www.plosmedicine.org/>, Annals of Internal Medicine at  
6 <http://www.annals.org/>, and Epidemiology at <http://www.epidem.com/>). Information on the STROBE Initiative is available at [www.strobe-statement.org](http://www.strobe-statement.org).  
7  
8  
9  
10  
11  
12  
13  
14  
15  
16  
17  
18  
19  
20  
21  
22  
23  
24  
25  
26  
27  
28  
29  
30  
31  
32  
33  
34  
35  
36  
37  
38  
39  
40  
41  
42  
43  
44  
45  
46  
47

For peer review only
